# Supplementary material for: Thuwalallenes A–E and Thuwalenynes A–C: New C15 Acetogenins with Anti-Inflammatory Activity from a Saudi Arabian Red Sea Laurencia sp
Source: PubMed Central journal article supplement (PMC6891555; doi:10.3390/md17110644), 2019-11-15
Supplement: marinedrugs-17-00644-s001.pdf [file marinedrugs-17-00644-s001.pdf]

**Supplementary Materials for**

**Thuwalallenes A–E and Thuwalenynes A–C: New C<sub>15</sub>  
Acetogenins with Anti-Inflammatory Activity from a  
Saudi Arabian Red Sea *Laurencia* sp.**

**Aikaterini Koutsaviti**<sup>1</sup>, **Maria G. Daskalaki**<sup>2</sup>, **Susana R. Agusti**<sup>3</sup>, **Sotirios C. Kampranis**<sup>2,4</sup>, **Christos Tsatsanis**<sup>2,5</sup>, **Carlos M. Duarte**<sup>3</sup>, **Vassilios Roussis**<sup>1</sup> and **Efstathia Ioannou**<sup>1,\*</sup>

<sup>1</sup> Section of Pharmacognosy and Chemistry of Natural Products, Department of Pharmacy, National and Kapodistrian University of Athens, Panepistimiopolis Zografou, Athens 15771, Greece; [kkoutsaviti@pharm.uoa.gr](mailto:kkoutsaviti@pharm.uoa.gr) (A.K.); [roussis@pharm.uoa.gr](mailto:roussis@pharm.uoa.gr) (V.R.)

<sup>2</sup> Laboratory of Clinical Chemistry, School of Medicine, University of Crete, Heraklion 70013, Greece; [m.daskalaki@med.uoc.gr](mailto:m.daskalaki@med.uoc.gr) (M.G.D.); [soka@plen.ku.dk](mailto:soka@plen.ku.dk) (S.C.K.); [tsatsani@uoc.gr](mailto:tsatsani@uoc.gr) (C.T.)

<sup>3</sup> Red Sea Research Center, King Abdullah University of Science and Technology, Thuwal, 23955-6900, Saudi Arabia; [susana.agusti@kaust.edu.sa](mailto:susana.agusti@kaust.edu.sa) (S.R.A.); [carlos.duarte@kaust.edu.sa](mailto:carlos.duarte@kaust.edu.sa) (C.M.D.)

<sup>4</sup> Present address: Section of Plant Biochemistry, Department of Plant and Environmental Sciences, University of Copenhagen, Thorvaldsensvej 40, 1871 Frederiksberg C, Denmark

<sup>5</sup> Institute of Molecular Biology and Biotechnology, FORTH, Heraklion 71110, Greece

\* Correspondence: [eioannou@pharm.uoa.gr](mailto:eioannou@pharm.uoa.gr) (E.I.); Tel.: +30 210 727 4913

## Table of Contents

|                                                                                                                                                                                   |     |
|-----------------------------------------------------------------------------------------------------------------------------------------------------------------------------------|-----|
| <b>Figure S1. (A-C)</b> Determination of concentration inducing 50% inhibition of NO production using LPS-treated RAW 264.7 for compounds <b>1–3, 5, 6, 8, 10</b> and <b>11</b> . | S4  |
| <b>Figure S2. (A-I)</b> Evaluation of the cytotoxic activity of compounds <b>1–6, 8, 10</b> and <b>11</b> by measuring proliferation rate of RAW 264.7 cells.                     | S5  |
| <b>Figure S3.</b> <sup>1</sup> H NMR spectrum of thuwalallene <b>A (1)</b> in CDCl <sub>3</sub> .                                                                                 | S6  |
| <b>Figure S4.</b> HSQC spectrum of thuwalallene <b>A (1)</b> in CDCl <sub>3</sub> .                                                                                               | S6  |
| <b>Figure S5.</b> HMBC spectrum of thuwalallene <b>A (1)</b> in CDCl <sub>3</sub> .                                                                                               | S7  |
| <b>Figure S6.</b> COSY spectrum of thuwalallene <b>A (1)</b> in CDCl <sub>3</sub> .                                                                                               | S7  |
| <b>Figure S7.</b> NOESY spectrum of thuwalallene <b>A (1)</b> in CDCl <sub>3</sub> .                                                                                              | S8  |
| <b>Figure S8.</b> HR-APCIMS spectrum of thuwalallene <b>A (1)</b> .                                                                                                               | S8  |
| <b>Figure S9.</b> <sup>1</sup> H NMR spectrum of thuwalallene <b>B (2)</b> in CDCl <sub>3</sub> .                                                                                 | S9  |
| <b>Figure S10.</b> HSQC spectrum of thuwalallene <b>B (2)</b> in CDCl <sub>3</sub> .                                                                                              | S9  |
| <b>Figure S11.</b> HMBC spectrum of thuwalallene <b>B (2)</b> in CDCl <sub>3</sub> .                                                                                              | S10 |
| <b>Figure S12.</b> COSY spectrum of thuwalallene <b>B (2)</b> in CDCl <sub>3</sub> .                                                                                              | S10 |
| <b>Figure S13.</b> NOESY spectrum of thuwalallene <b>B (2)</b> in CDCl <sub>3</sub> .                                                                                             | S11 |
| <b>Figure S14.</b> HR-APCIMS spectrum of thuwalallene <b>B (2)</b> .                                                                                                              | S11 |
| <b>Figure S15.</b> <sup>1</sup> H NMR spectrum of thuwalallene <b>C (3)</b> in CDCl <sub>3</sub> .                                                                                | S12 |
| <b>Figure S16.</b> <sup>13</sup> C NMR spectrum of thuwalallene <b>C (3)</b> in CDCl <sub>3</sub> .                                                                               | S12 |
| <b>Figure S17.</b> HSQC spectrum of thuwalallene <b>C (3)</b> in CDCl <sub>3</sub> .                                                                                              | S13 |
| <b>Figure S18.</b> HMBC spectrum of thuwalallene <b>C (3)</b> in CDCl <sub>3</sub> .                                                                                              | S13 |
| <b>Figure S19.</b> COSY spectrum of thuwalallene <b>C (3)</b> in CDCl <sub>3</sub> .                                                                                              | S14 |
| <b>Figure S20.</b> NOESY spectrum of thuwalallene <b>C (3)</b> in CDCl <sub>3</sub> .                                                                                             | S14 |
| <b>Figure S21.</b> HR-APCIMS spectrum of thuwalallene <b>C (3)</b> .                                                                                                              | S15 |
| <b>Figure S22.</b> <sup>1</sup> H NMR spectrum of thuwalenyne <b>A (4)</b> in CDCl <sub>3</sub> .                                                                                 | S16 |
| <b>Figure S23.</b> HSQC spectrum of thuwalenyne <b>A (4)</b> in CDCl <sub>3</sub> .                                                                                               | S16 |
| <b>Figure S24.</b> HMBC spectrum of thuwalenyne <b>A (4)</b> in CDCl <sub>3</sub> .                                                                                               | S17 |
| <b>Figure S25.</b> COSY spectrum of thuwalenyne <b>A (4)</b> in CDCl <sub>3</sub> .                                                                                               | S17 |
| <b>Figure S26.</b> NOESY spectrum of thuwalenyne <b>A (4)</b> in CDCl <sub>3</sub> .                                                                                              | S18 |
| <b>Figure S27.</b> HR-APCIMS spectrum of thuwalenyne <b>A (4)</b> .                                                                                                               | S18 |
| <b>Figure S28.</b> <sup>1</sup> H NMR spectrum of thuwalallene <b>D (5)</b> in CDCl <sub>3</sub> .                                                                                | S19 |
| <b>Figure S29.</b> HSQC spectrum of thuwalallene <b>D (5)</b> in CDCl <sub>3</sub> .                                                                                              | S19 |
| <b>Figure S30.</b> HMBC spectrum of thuwalallene <b>D (5)</b> in CDCl <sub>3</sub> .                                                                                              | S20 |
| <b>Figure S31.</b> COSY spectrum of thuwalallene <b>D (5)</b> in CDCl <sub>3</sub> .                                                                                              | S20 |
| <b>Figure S32.</b> NOESY spectrum of thuwalallene <b>D (5)</b> in CDCl <sub>3</sub> .                                                                                             | S21 |
| <b>Figure S33.</b> HR-APCIMS spectrum of thuwalallene <b>D (5)</b> .                                                                                                              | S21 |
| <b>Figure S34.</b> <sup>1</sup> H NMR spectrum of thuwalenyne <b>B (6)</b> in CDCl <sub>3</sub> .                                                                                 | S22 |
| <b>Figure S35.</b> HSQC spectrum of thuwalenyne <b>B (6)</b> in CDCl <sub>3</sub> .                                                                                               | S22 |
| <b>Figure S36.</b> HMBC spectrum of thuwalenyne <b>B (6)</b> in CDCl <sub>3</sub> .                                                                                               | S23 |
| <b>Figure S37.</b> COSY spectrum of thuwalenyne <b>B (6)</b> in CDCl <sub>3</sub> .                                                                                               | S23 |
| <b>Figure S38.</b> NOESY spectrum of thuwalenyne <b>B (6)</b> in CDCl <sub>3</sub> .                                                                                              | S24 |
| <b>Figure S39.</b> HR-APCIMS spectrum of thuwalenyne <b>B (6)</b> .                                                                                                               | S24 |
| <b>Figure S40.</b> <sup>1</sup> H NMR spectrum of thuwalenyne <b>C (7)</b> in CDCl <sub>3</sub> .                                                                                 | S25 |
| <b>Figure S41.</b> HSQC spectrum of thuwalenyne <b>C (7)</b> in CDCl <sub>3</sub> .                                                                                               | S25 |
| <b>Figure S42.</b> HMBC spectrum of thuwalenyne <b>C (7)</b> in CDCl <sub>3</sub> .                                                                                               | S26 |
| <b>Figure S43.</b> COSY spectrum of thuwalenyne <b>C (7)</b> in CDCl <sub>3</sub> .                                                                                               | S26 |
| <b>Figure S44.</b> NOESY spectrum of thuwalenyne <b>C (7)</b> in CDCl <sub>3</sub> .                                                                                              | S27 |
| <b>Figure S45.</b> HR-APCIMS spectrum of thuwalenyne <b>C (7)</b> .                                                                                                               | S27 |
| <b>Figure S46.</b> <sup>1</sup> H NMR spectrum of thuwalallene <b>E (8)</b> in CDCl <sub>3</sub> .                                                                                | S28 |
| <b>Figure S47.</b> <sup>13</sup> C NMR spectrum of thuwalallene <b>E (8)</b> in CDCl <sub>3</sub> .                                                                               | S28 |
| <b>Figure S48.</b> HSQC spectrum of thuwalallene <b>E (8)</b> in CDCl <sub>3</sub> .                                                                                              | S29 |
| <b>Figure S49.</b> HMBC spectrum of thuwalallene <b>E (8)</b> in CDCl <sub>3</sub> .                                                                                              | S29 |
| <b>Figure S50.</b> COSY spectrum of thuwalallene <b>E (8)</b> in CDCl <sub>3</sub> .                                                                                              | S30 |
| <b>Figure S51.</b> NOESY spectrum of thuwalallene <b>E (8)</b> in CDCl <sub>3</sub> .                                                                                             | S30 |
| <b>Figure S52.</b> HR-APCIMS spectrum of thuwalallene <b>E (8)</b> .                                                                                                              | S31 |

|                                                                                                           |     |
|-----------------------------------------------------------------------------------------------------------|-----|
| <b>Figure S53.</b> $^1\text{H}$ NMR spectrum of <i>cis</i> -maneonene D ( <b>9</b> ) in $\text{CDCl}_3$ . | S32 |
| <b>Figure S54.</b> $^1\text{H}$ NMR spectrum of thysiferol ( <b>10</b> ) in $\text{CDCl}_3$ .             | S32 |
| <b>Figure S55.</b> $^1\text{H}$ NMR spectrum of 23-acetyl-thysiferol ( <b>11</b> ) in $\text{CDCl}_3$ .   | S33 |

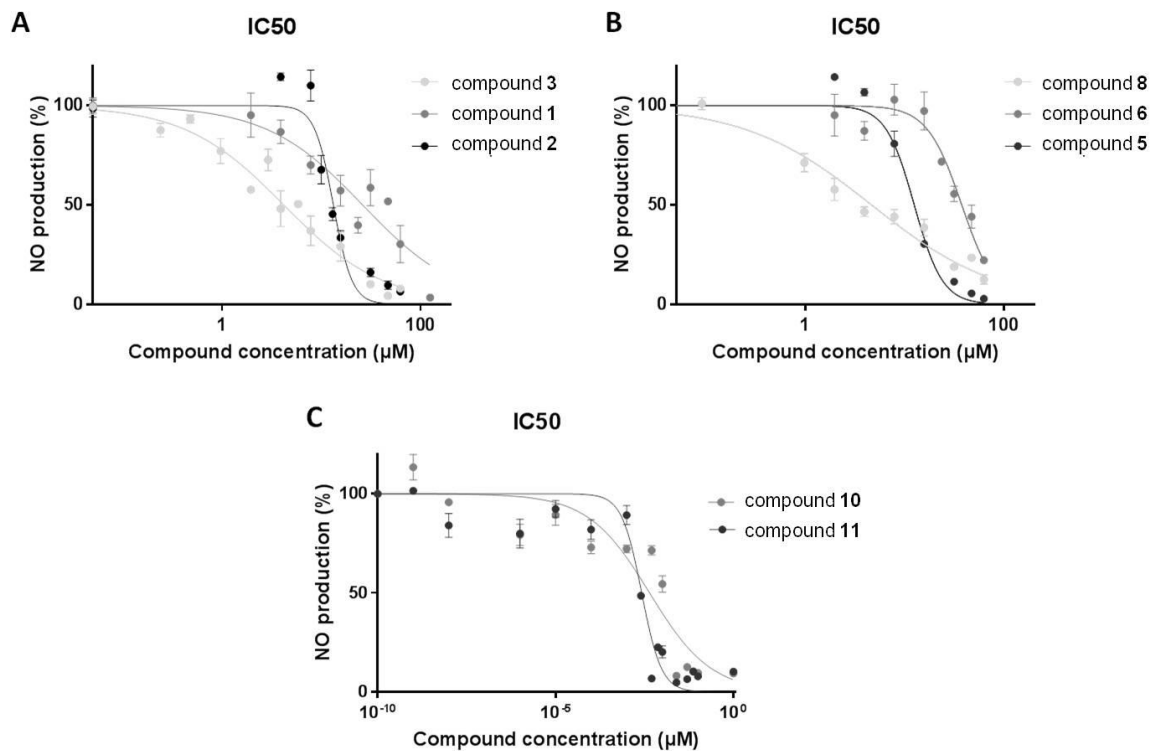

**Figure S1.** (A-C) Determination of concentration inducing 50% inhibition of NO production using LPS-treated RAW 264.7 for compounds 1–3, 5, 6, 8, 10 and 11. Inhibition of NO production was compared to that of cells treated with Carbowax 400 0.1% v/v.

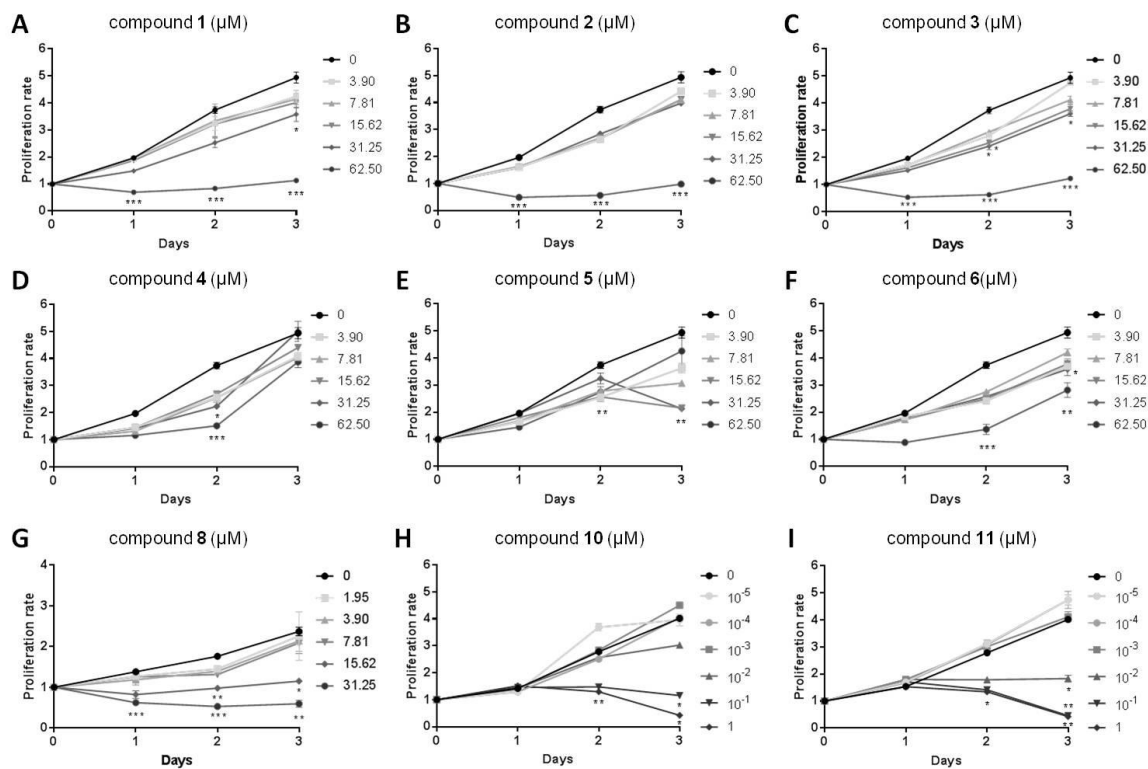

**Figure S2.** (A-I) Evaluation of the cytotoxic activity of compounds 1–6, 8, 10 and 11 by measuring proliferation rate of RAW 264.7 cells. Proliferation rate was established using MTT treatment for 72 h and normalized to measurement of the initial cells plated and compared to that of cells treated with Carbowax 400 0.1% v/v. Statistical analysis was performed using Kruskal-Wallis non-parametric test in Graphpad Prism 7.0. Graphs represent mean  $\pm$  SEM (\* indicates  $P < 0.05$ , \*\* indicates  $P < 0.01$ , \*\*\* indicates  $P < 0.001$ ).

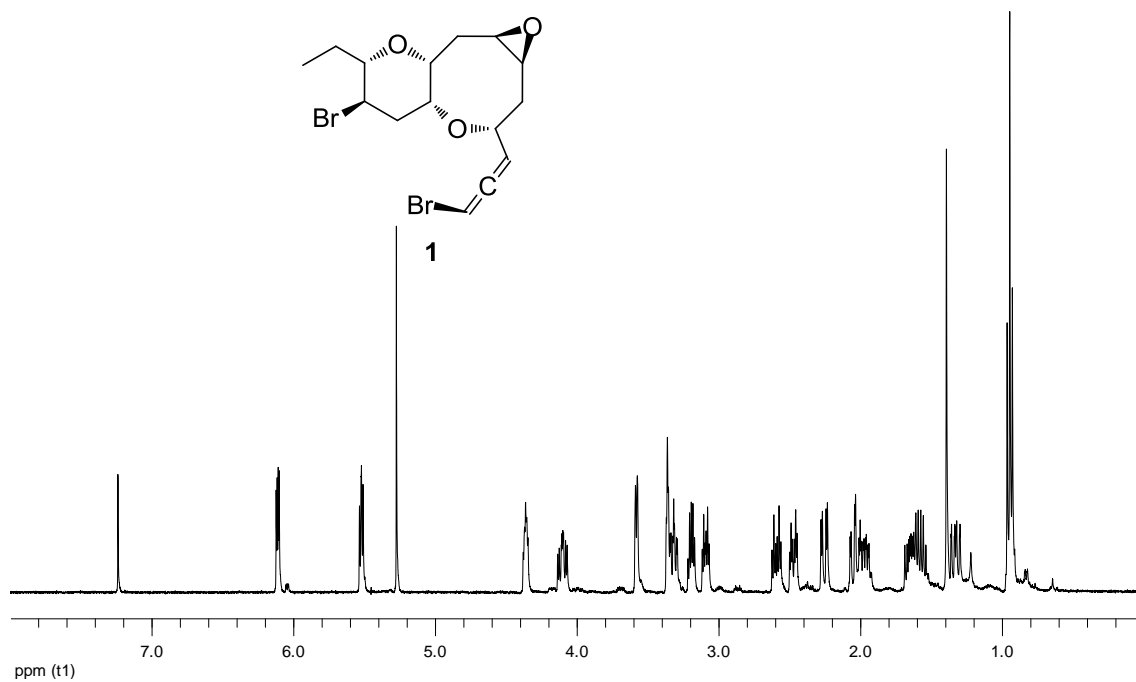

**Figure S3.** <sup>1</sup>H NMR spectrum of thuwalallene A (1) in CDCl<sub>3</sub>.

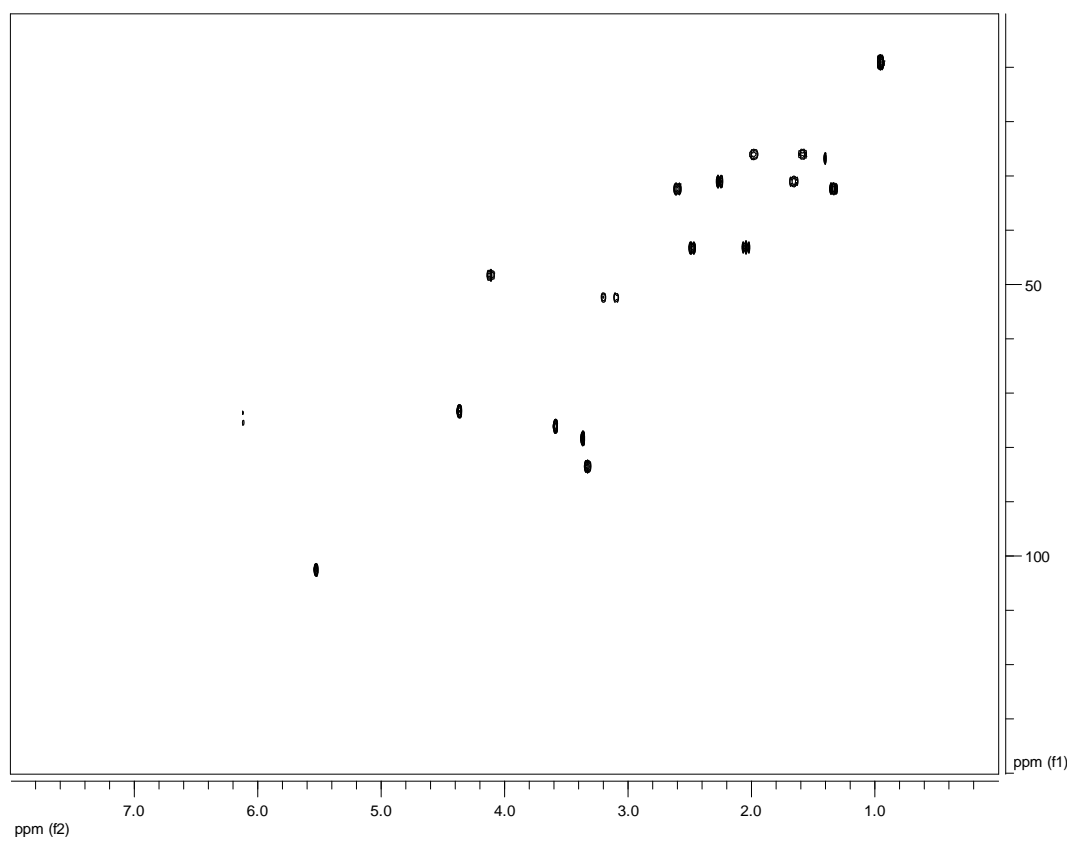

**Figure S4.** HSQC spectrum of thuwalallene A (1) in CDCl<sub>3</sub>.

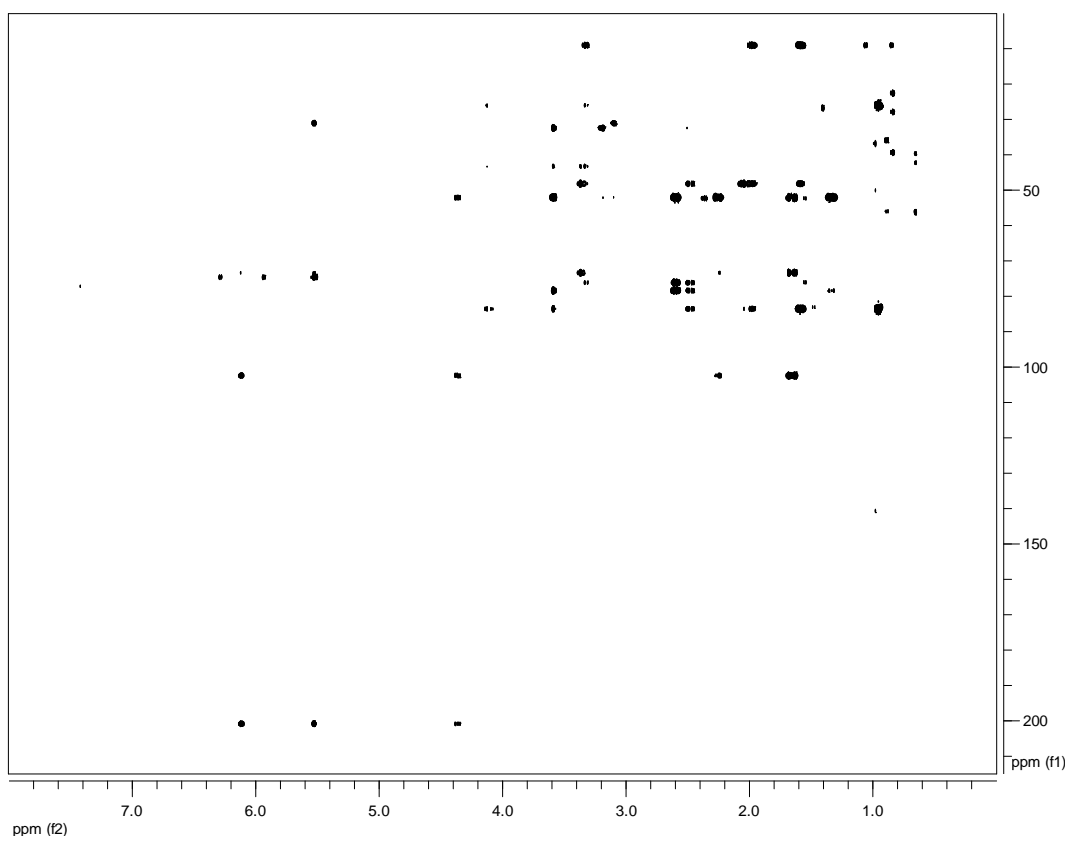

**Figure S5.** HMBC spectrum of thuwalallene A (**1**) in  $\text{CDCl}_3$ .

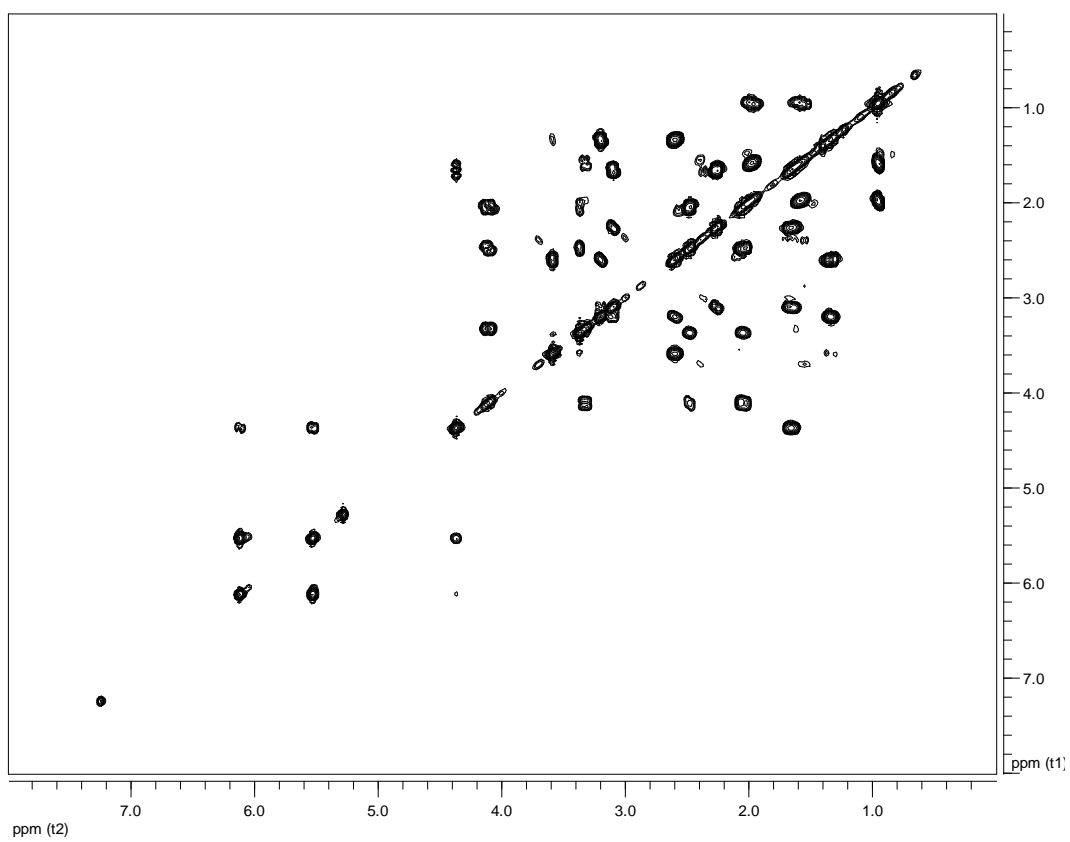

**Figure S6.** COSY spectrum of thuwalallene A (**1**) in  $\text{CDCl}_3$ .

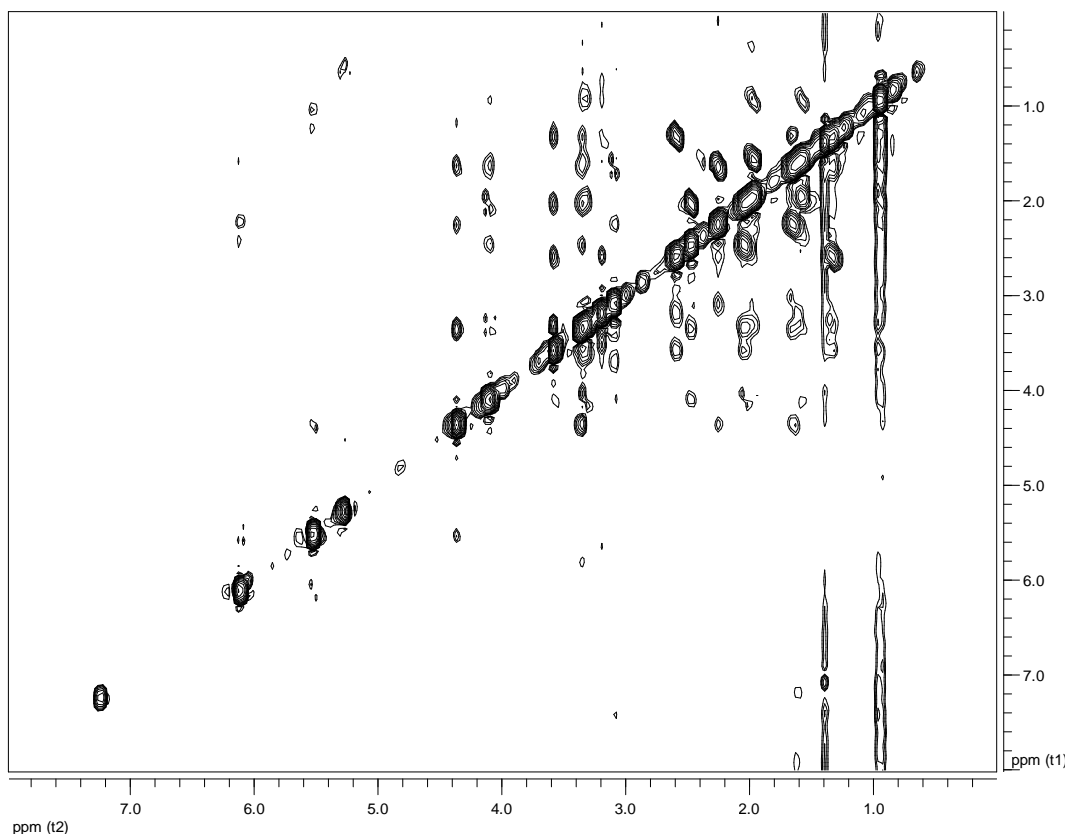

Figure S7. NOESY spectrum of thuwalallene A (1) in CDCl<sub>3</sub>.

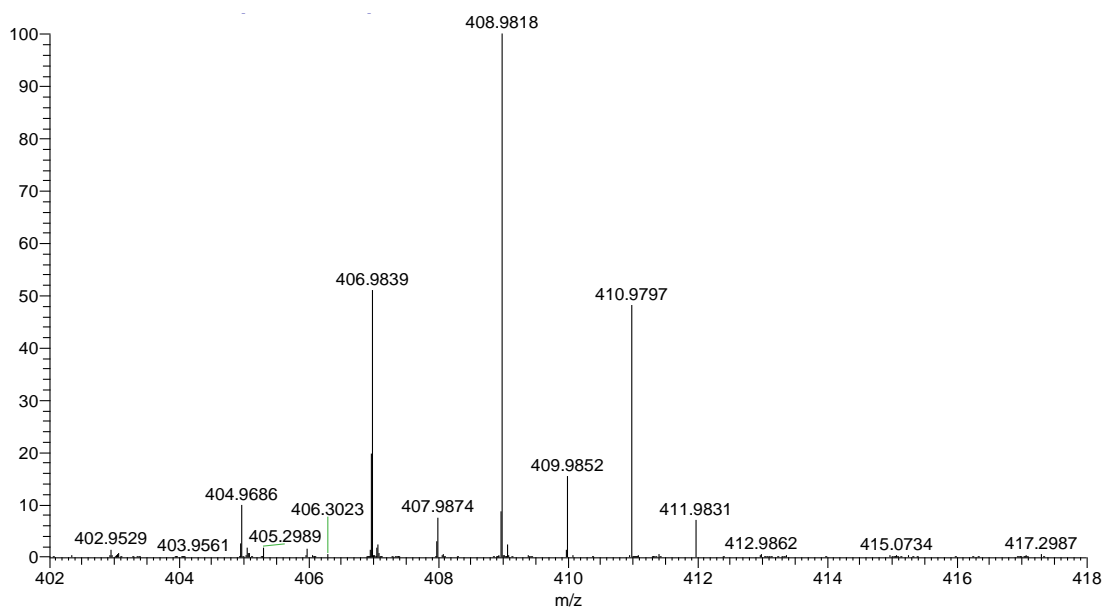

Figure S8. HR-APCIMS spectrum of thuwalallene A (1).



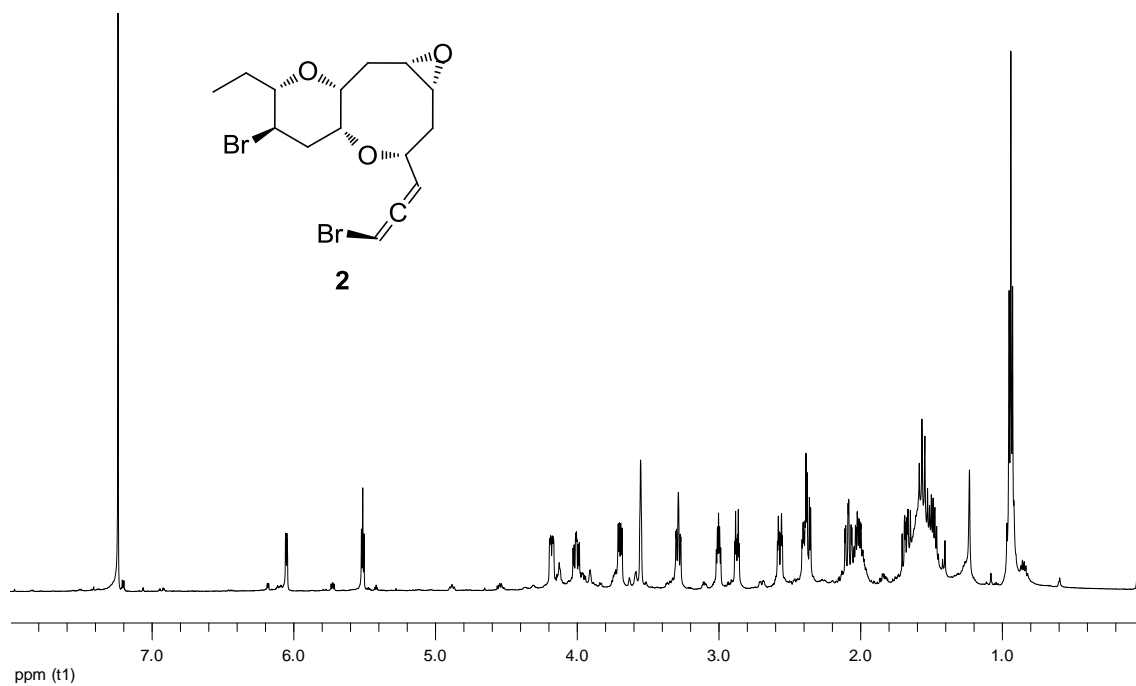

**Figure S9.** <sup>1</sup>H NMR spectrum of thuwalallene B (**2**) in CDCl<sub>3</sub>.

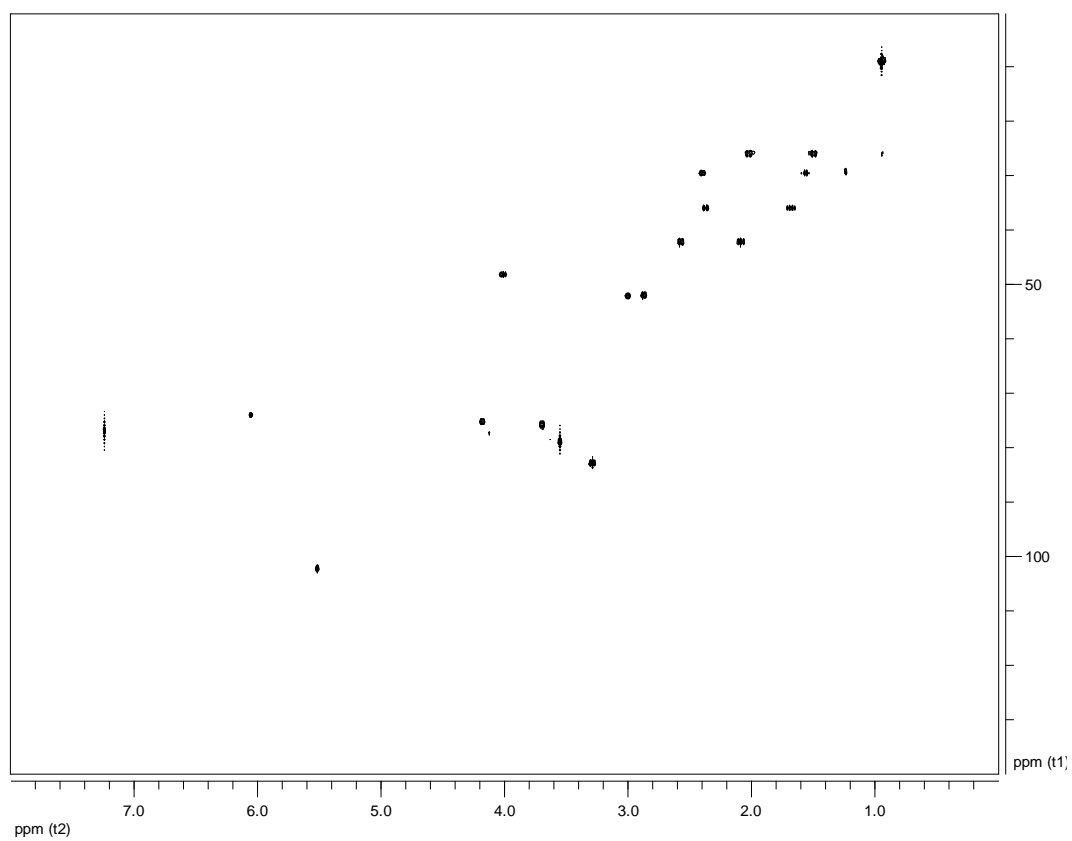

**Figure S10.** HSQC spectrum of thuwalallene B (**2**) in CDCl<sub>3</sub>.

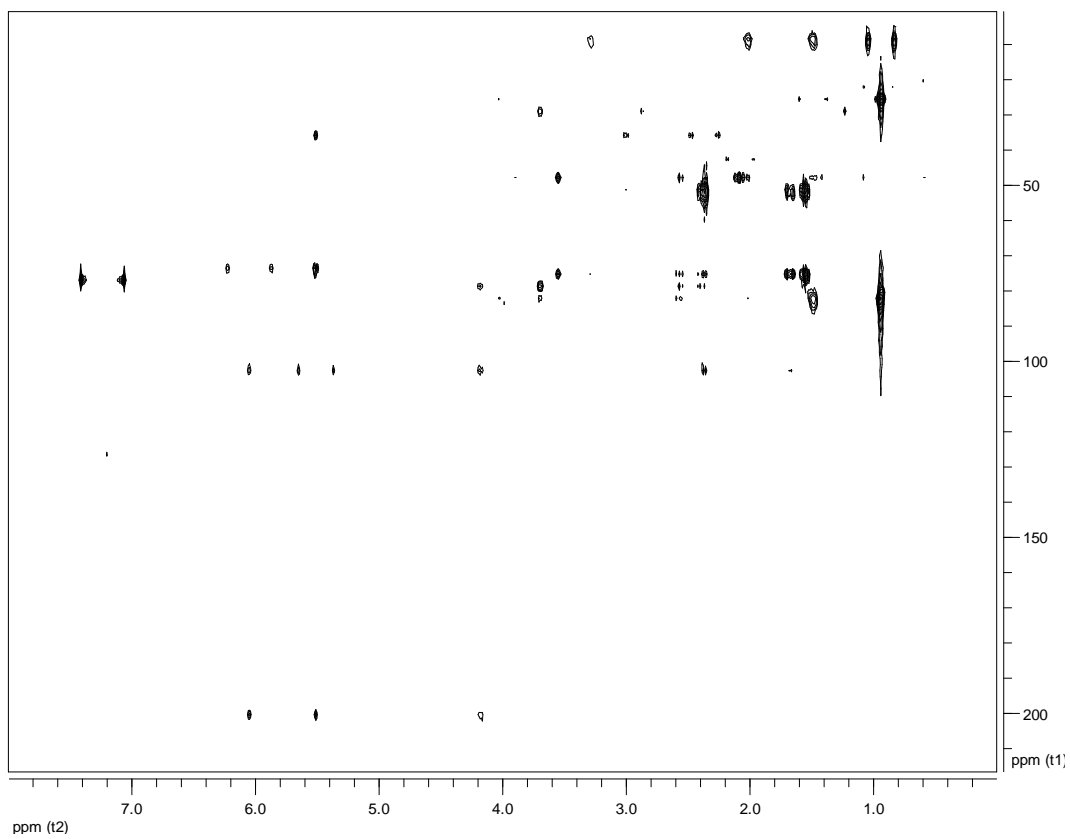

**Figure S11.** HMBC spectrum of thuwalallene B (**2**) in CDCl<sub>3</sub>.

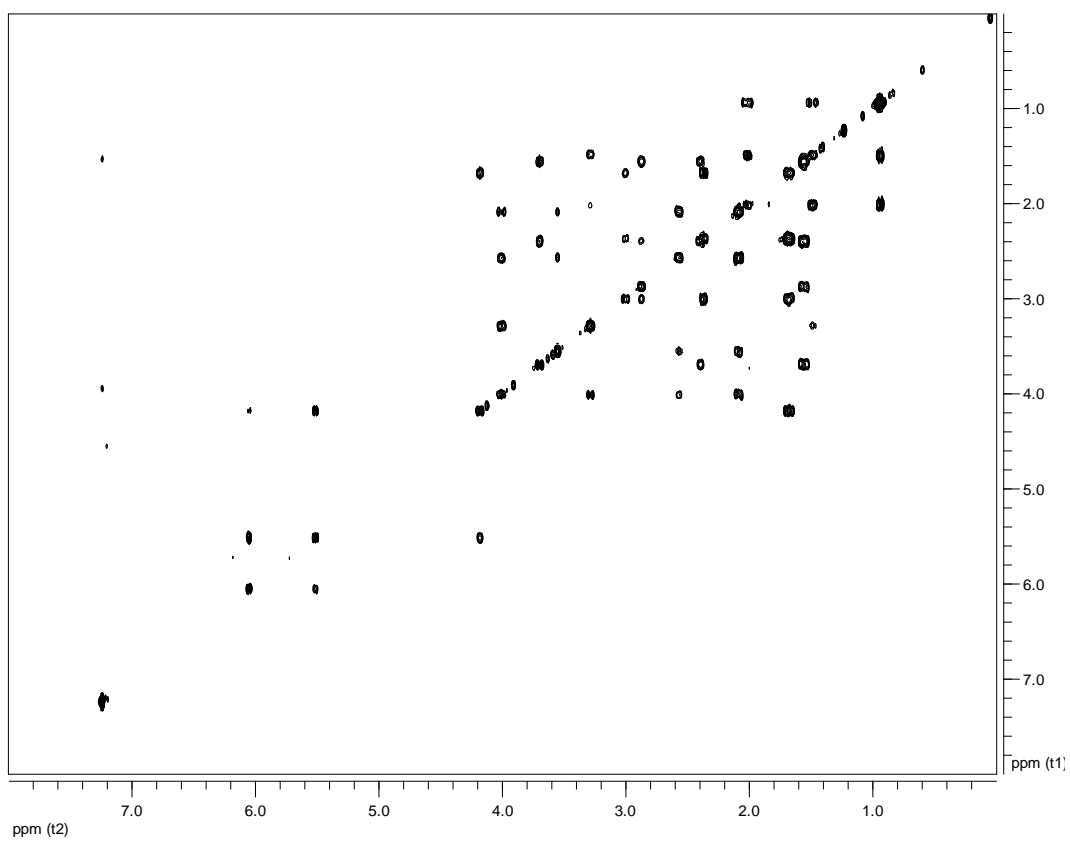

**Figure S12.** COSY spectrum of thuwalallene B (**2**) in CDCl<sub>3</sub>.

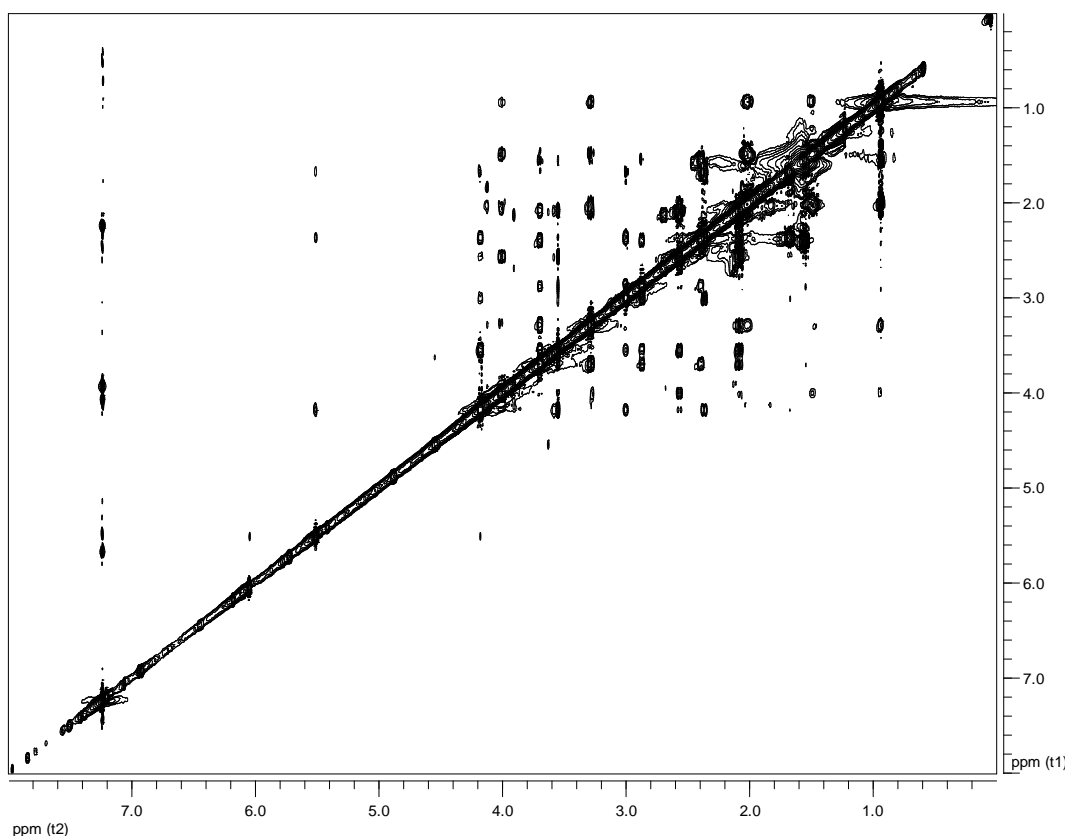

**Figure S13.** NOESY spectrum of thuwalallene B (2) in  $\text{CDCl}_3$ .

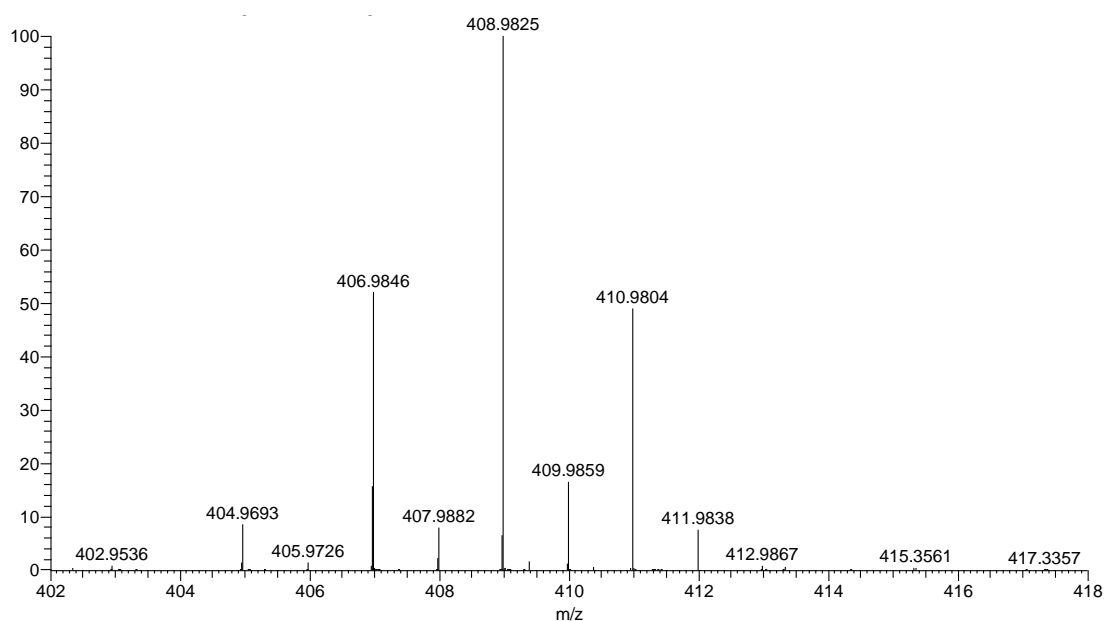

**Figure S14.** HR-APCIMS spectrum of thuwalallene B (2).

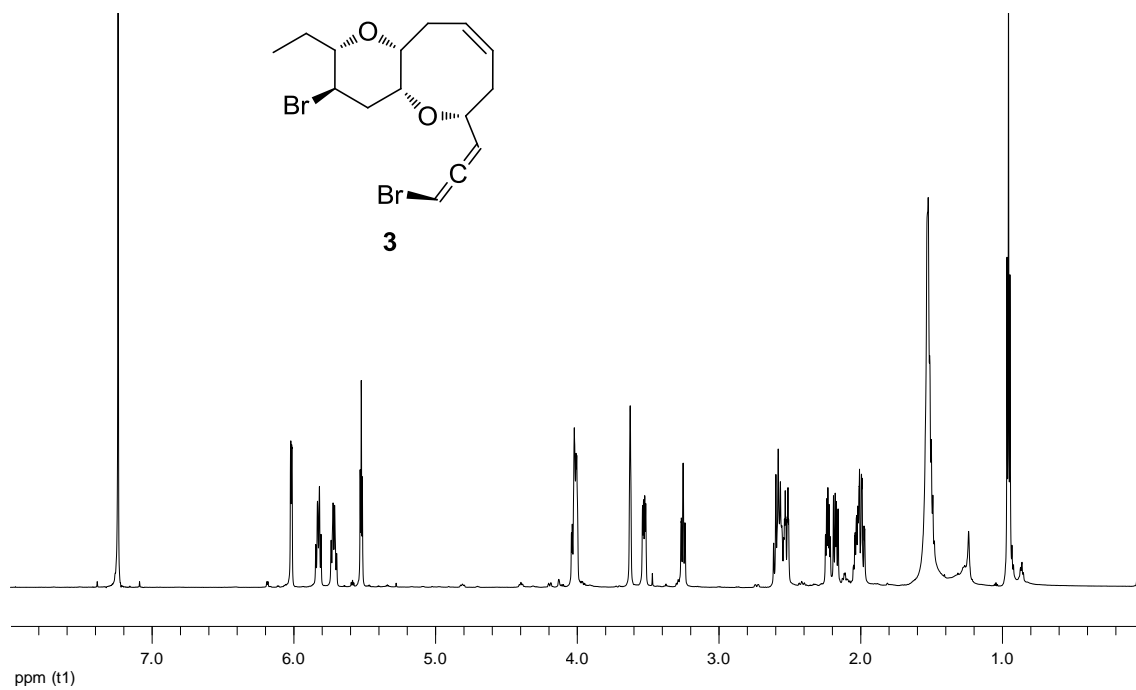

Figure S15. <sup>1</sup>H NMR spectrum of thuwalallene C (3) in CDCl<sub>3</sub>.

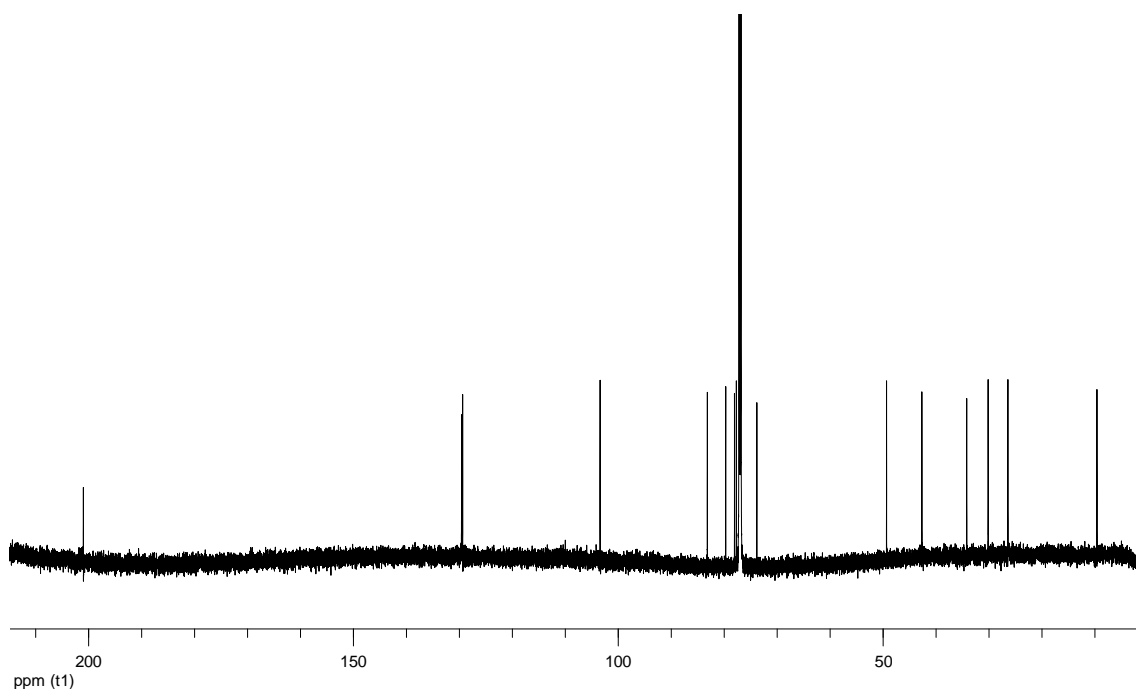

Figure S16. <sup>13</sup>C NMR spectrum of thuwalallene C (3) in CDCl<sub>3</sub>.

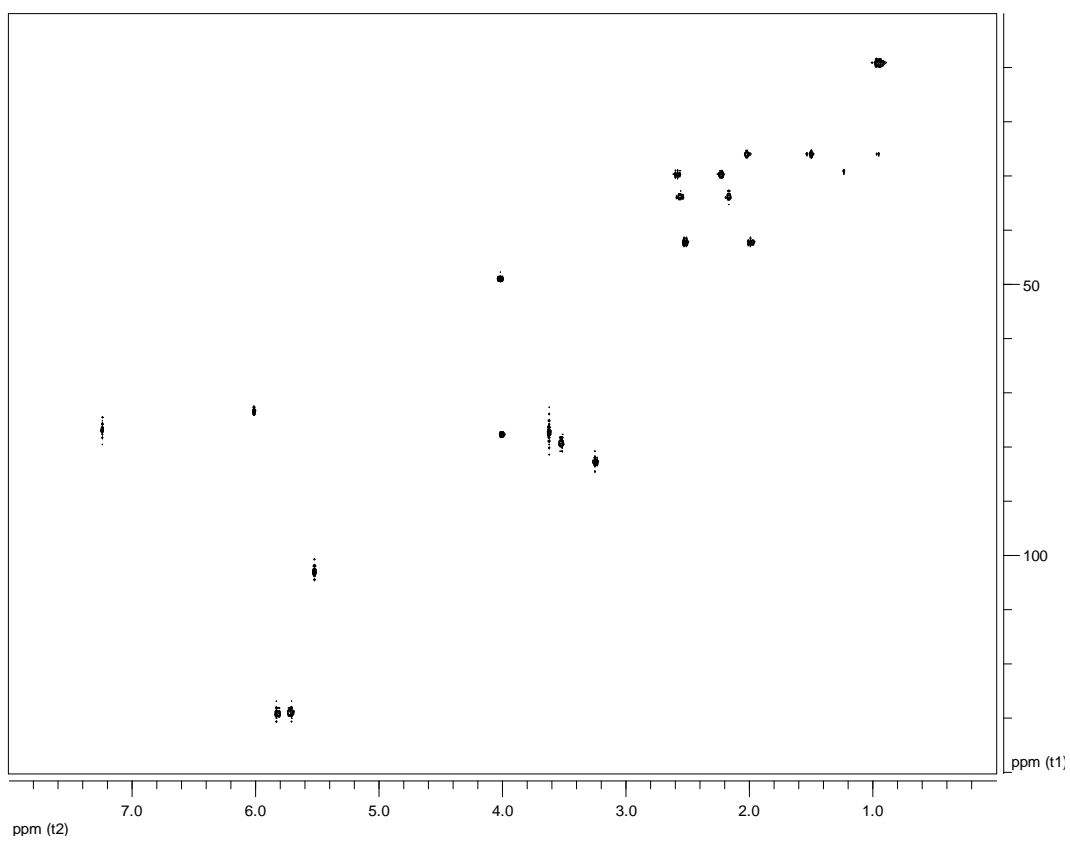

**Figure S17.** HSQC spectrum of thuwalallene C (**3**) in CDCl<sub>3</sub>.

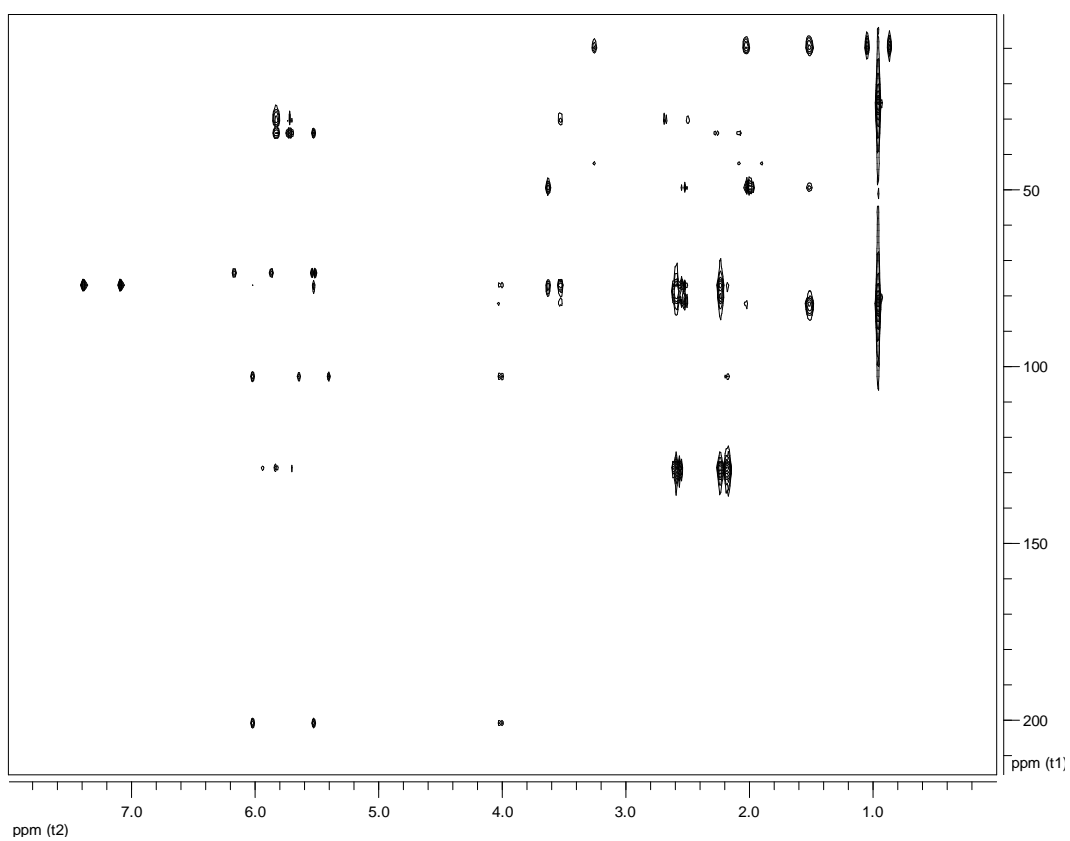

**Figure S18.** HMBC spectrum of thuwalallene C (**3**) in CDCl<sub>3</sub>.

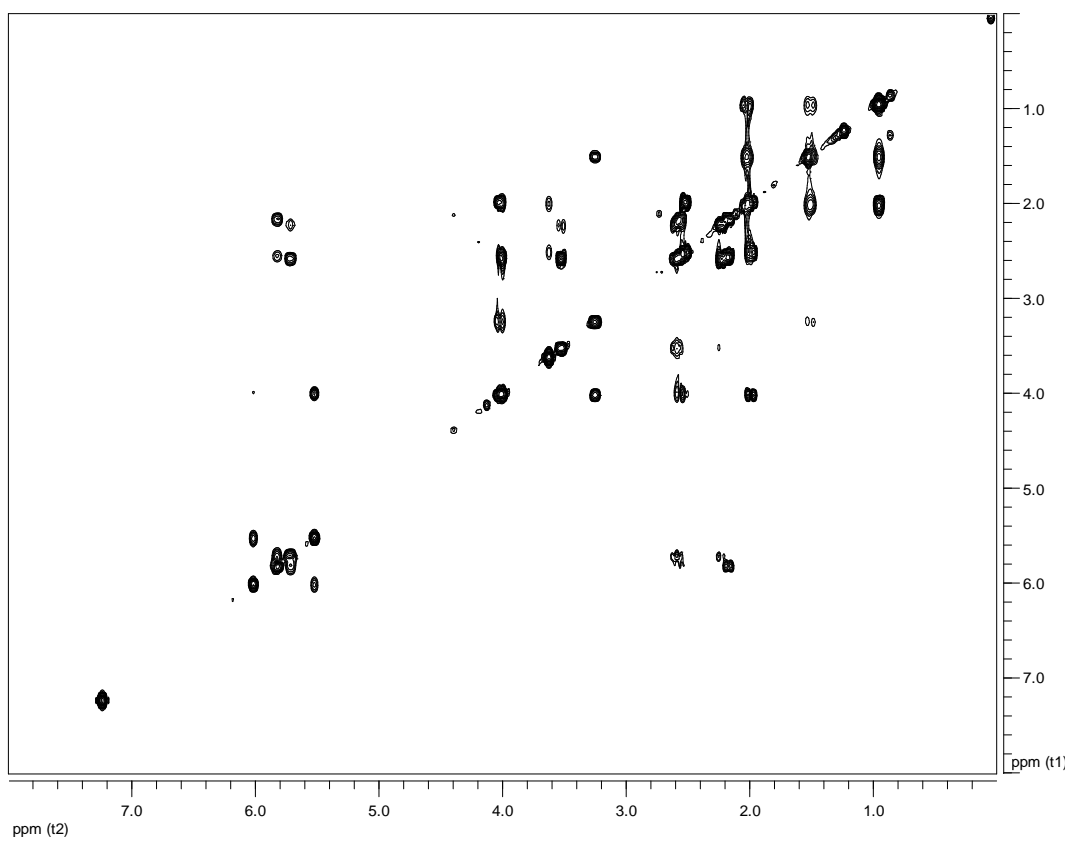

Figure S19. COSY spectrum of thuwalallene C (3) in  $\text{CDCl}_3$ .

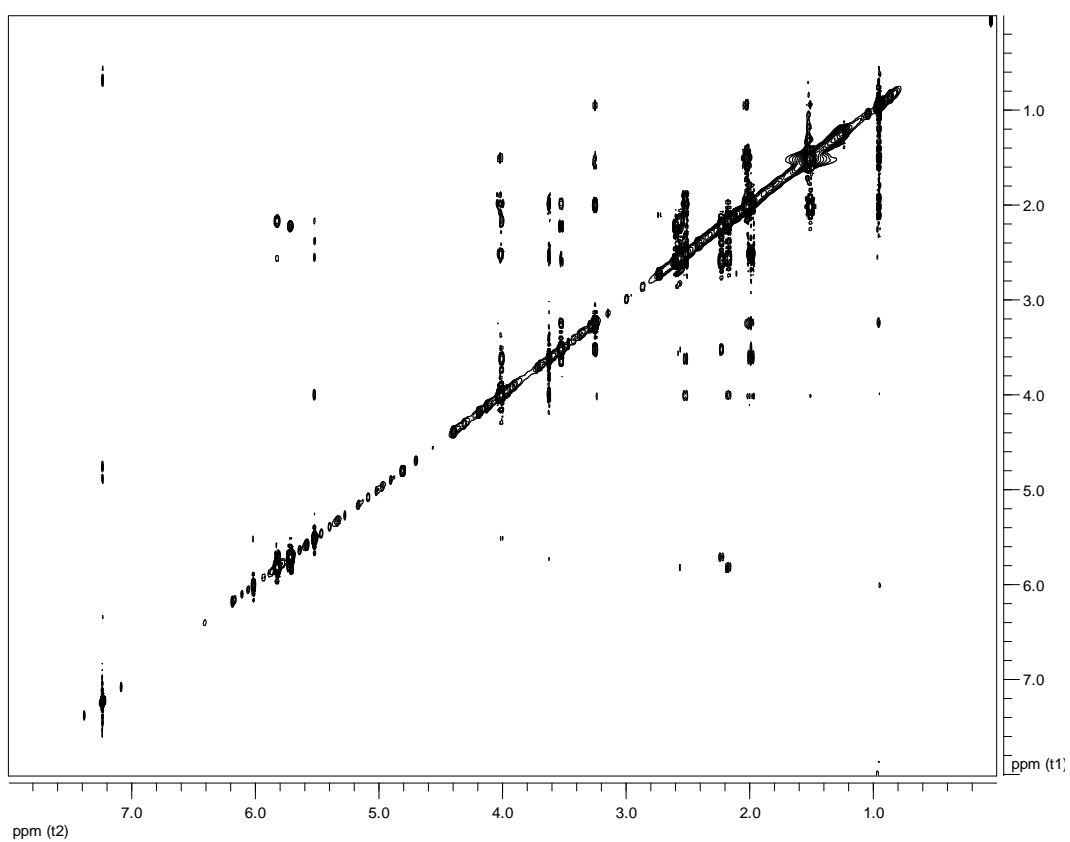

Figure S20. NOESY spectrum of thuwalallene C (3) in  $\text{CDCl}_3$ .

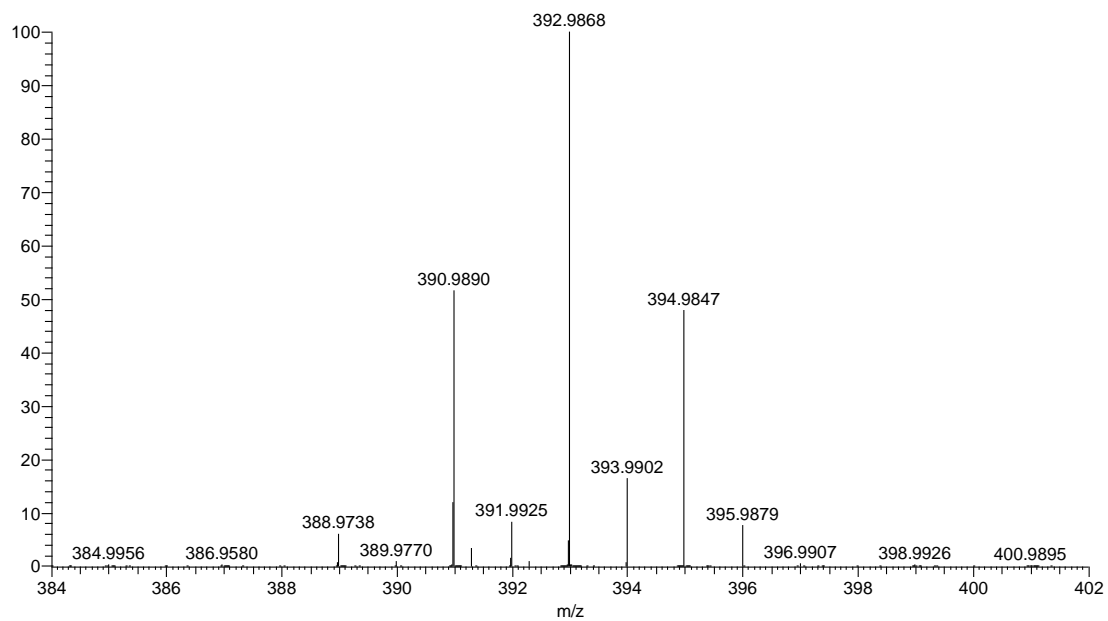

**Figure S21.** HR-APCIMS spectrum of thuwalallene C (3).

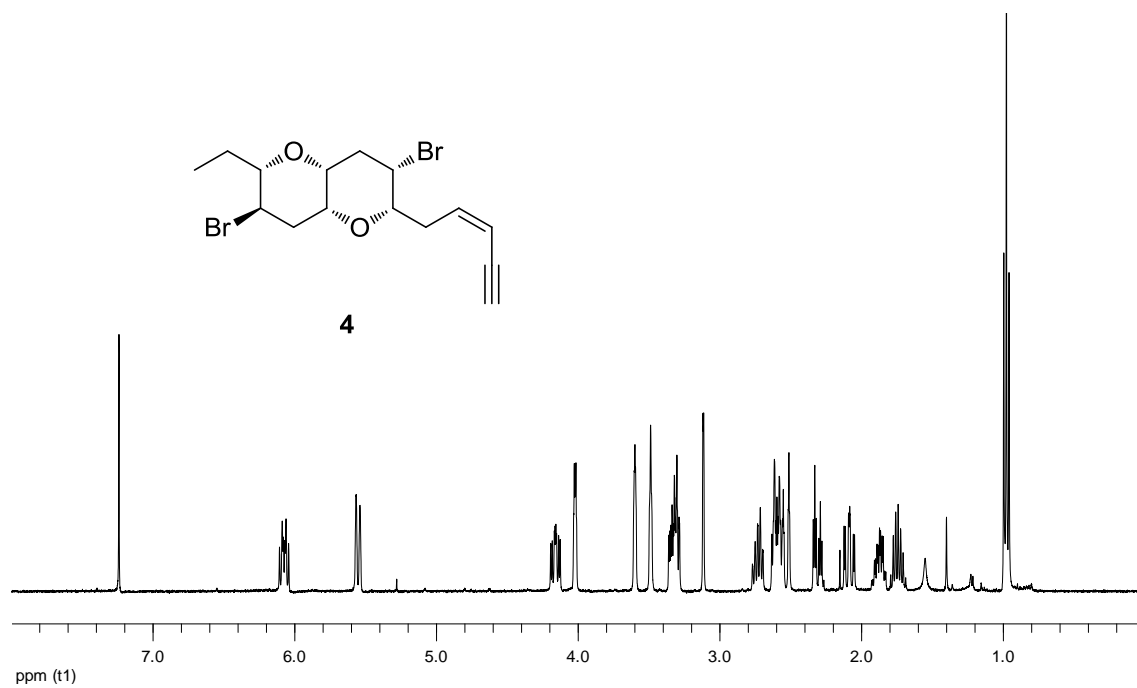

Figure S22. <sup>1</sup>H NMR spectrum of thuwalenyne A (4) in CDCl<sub>3</sub>.

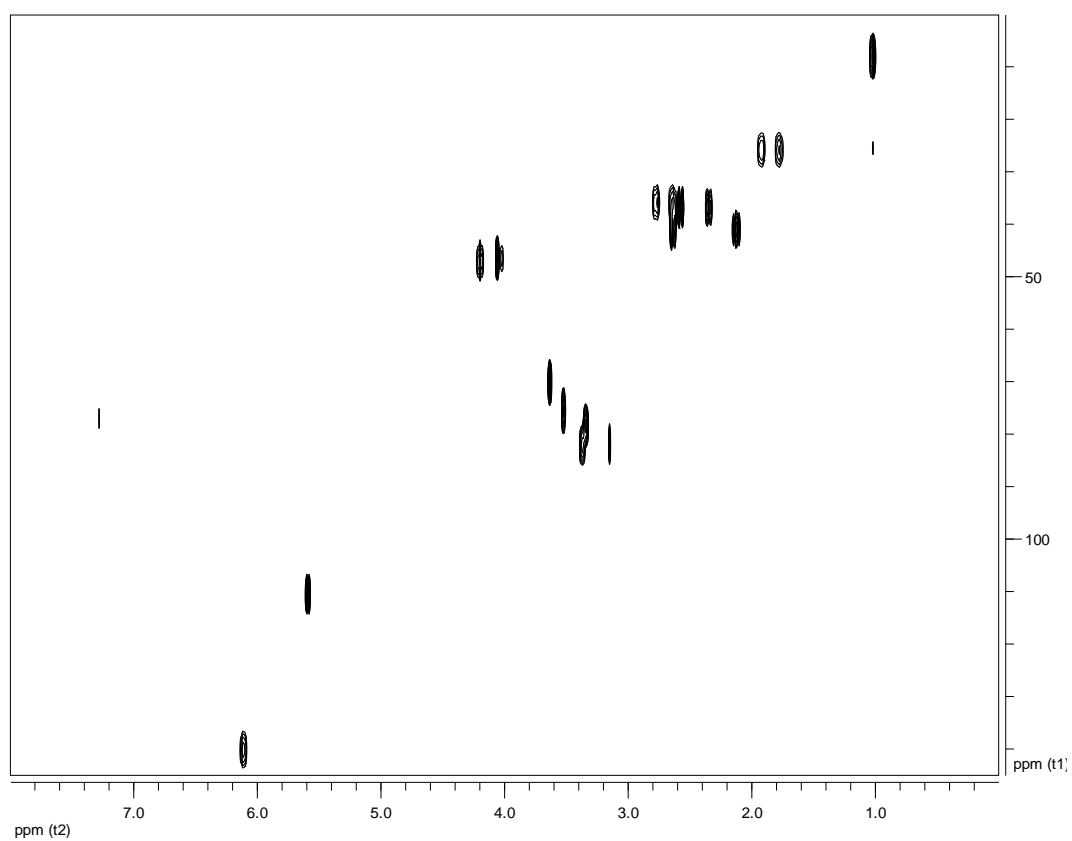

Figure S23. HSQC spectrum of thuwalenyne A (4) in CDCl<sub>3</sub>.



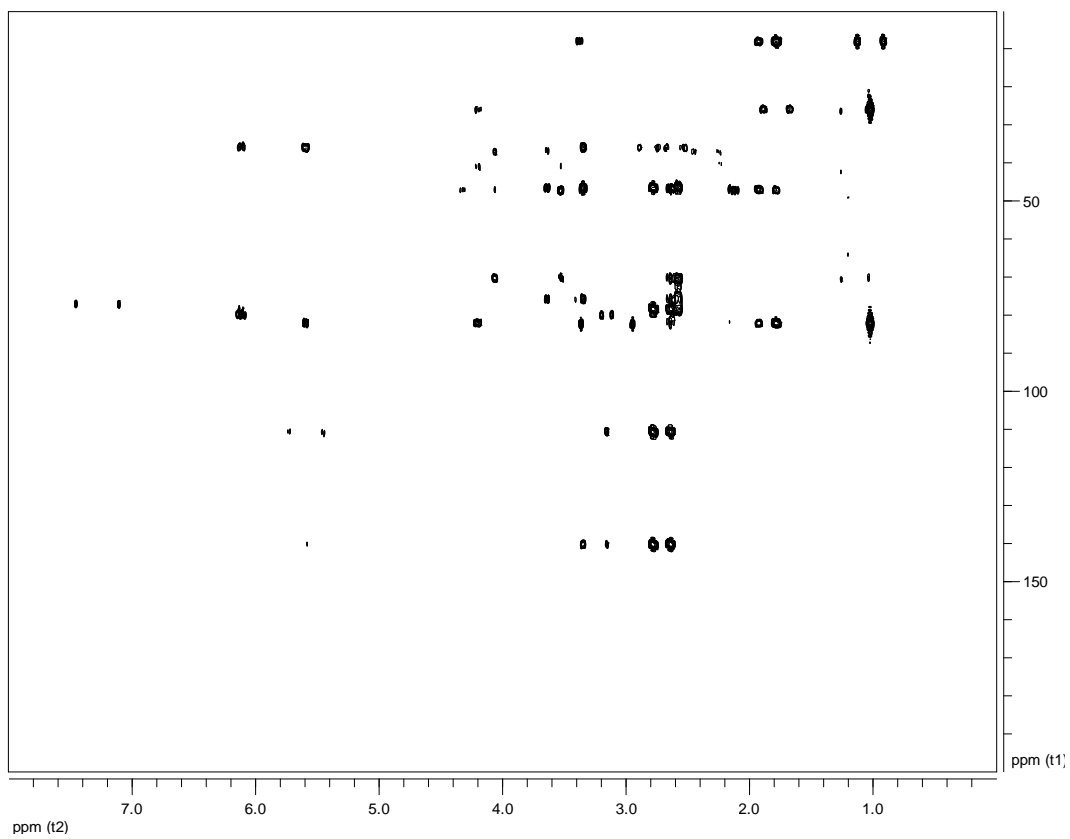

Figure S24. HMBC spectrum of thuwalenyne A (4) in CDCl<sub>3</sub>.

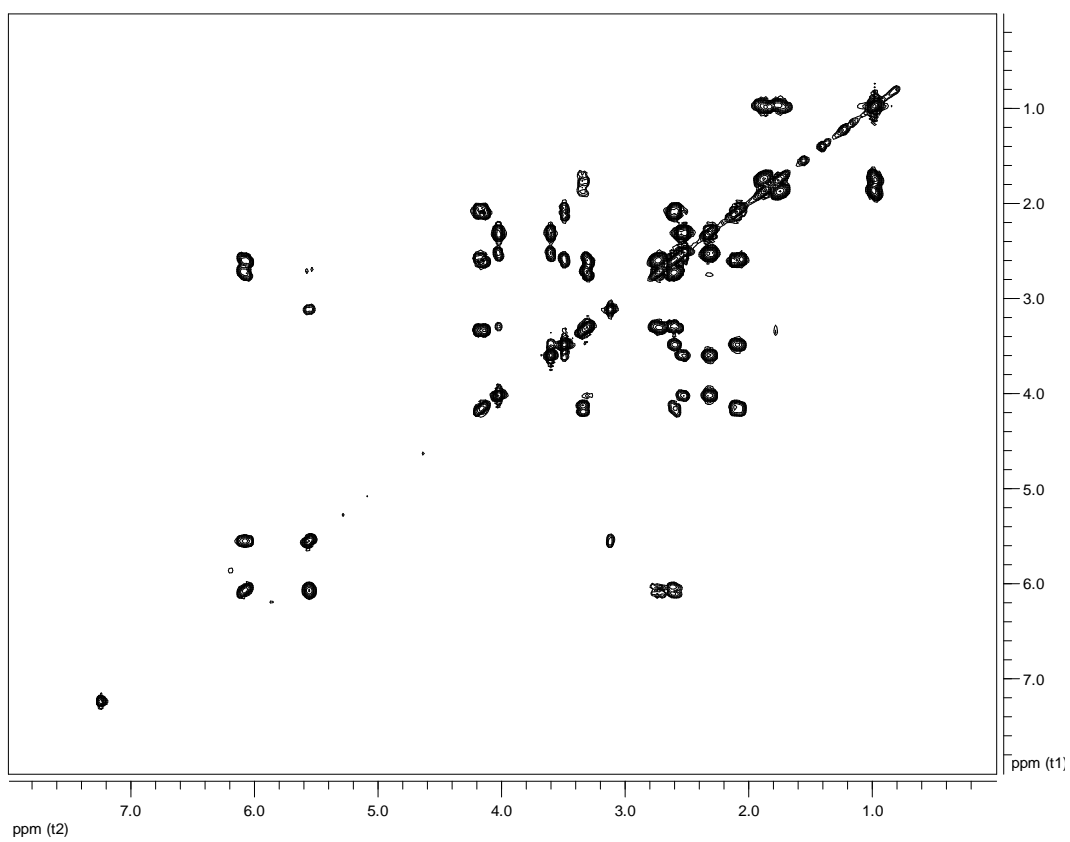

Figure S25. COSY spectrum of thuwalenyne A (4) in CDCl<sub>3</sub>.

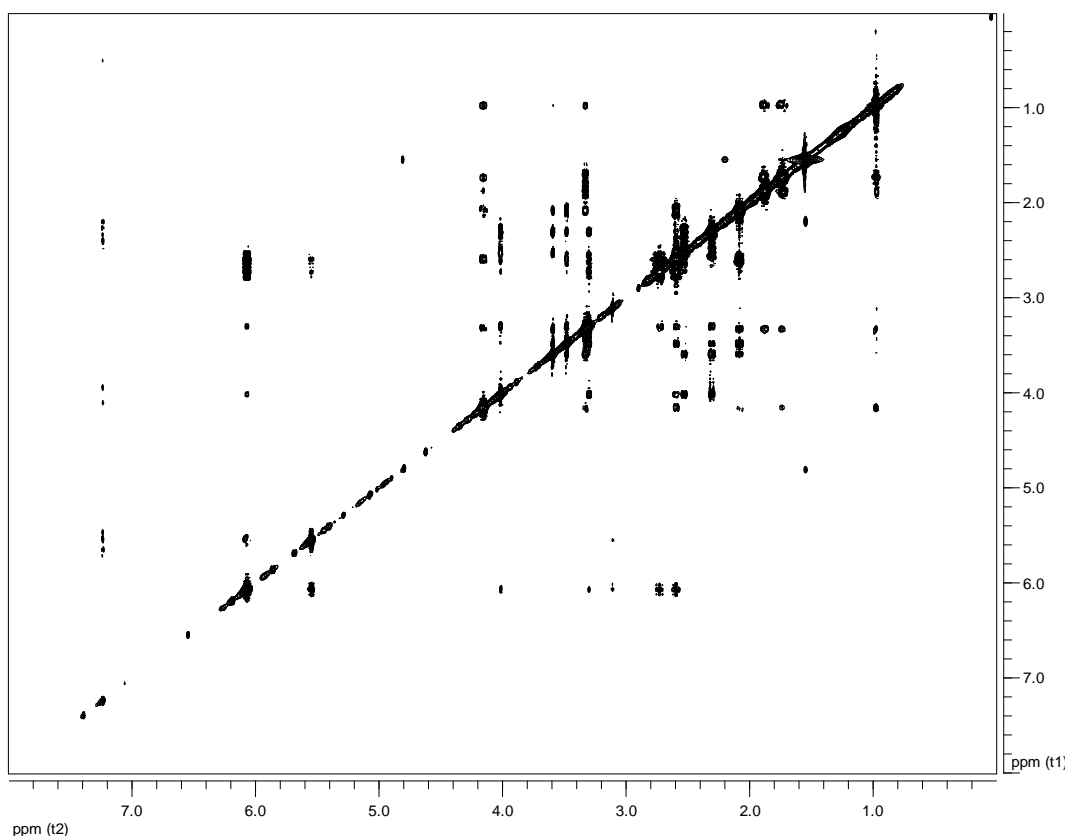

Figure S26. NOESY spectrum of thuwalenyne A (4) in CDCl<sub>3</sub>.

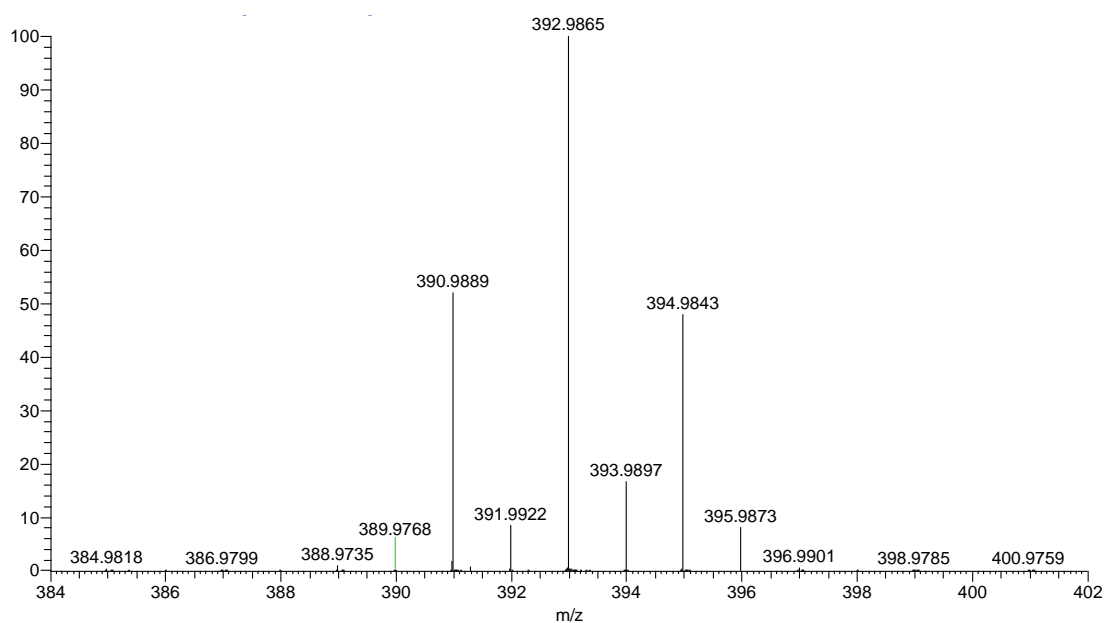

Figure S27. HR-APCIMS spectrum of thuwalenyne A (4).

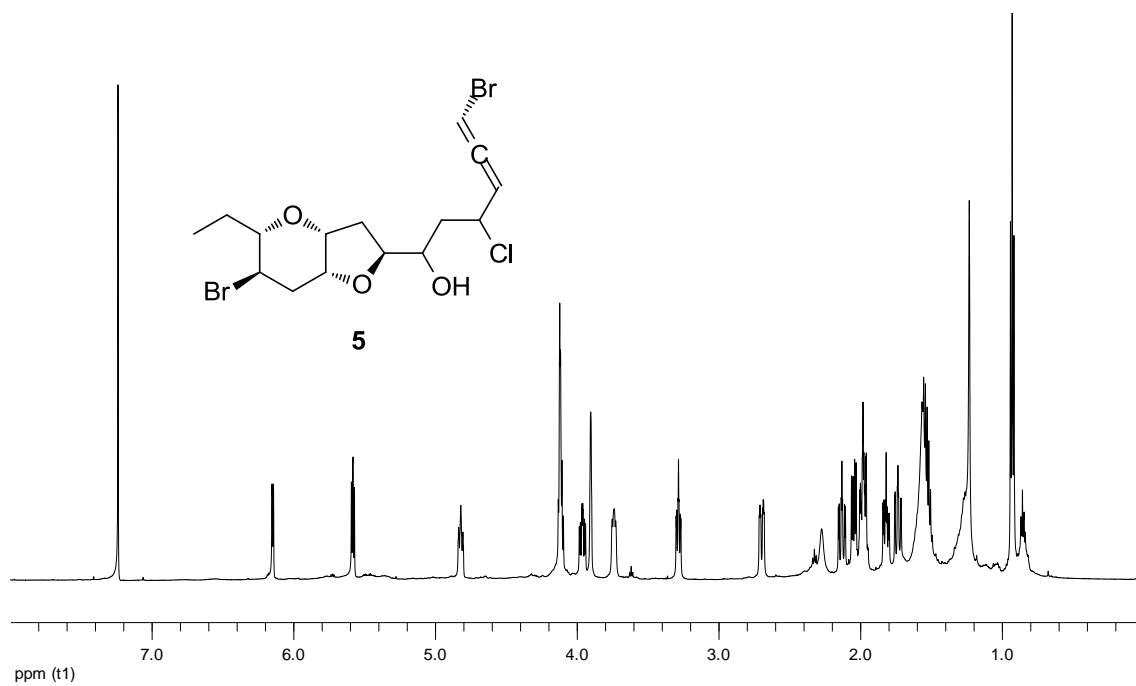

Figure S28.  $^1\text{H}$  NMR spectrum of thuwalallene D (5) in  $\text{CDCl}_3$ .

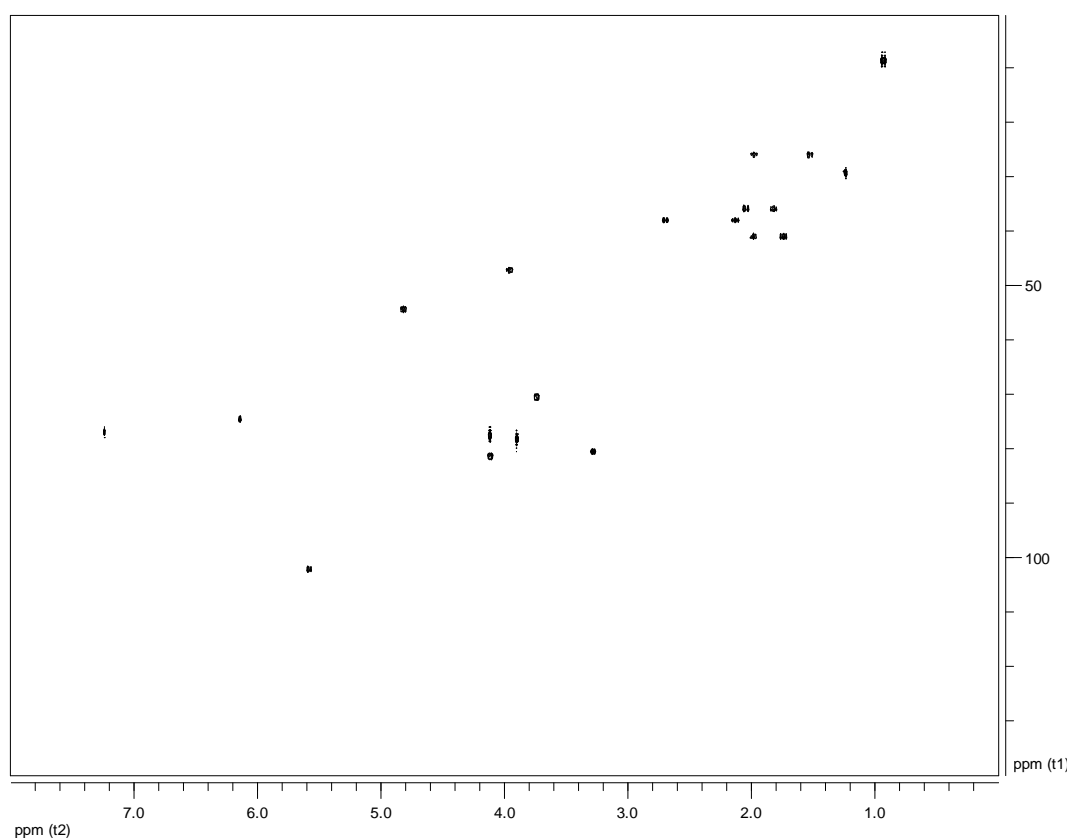

Figure S29. HSQC spectrum of thuwalallene D (5) in  $\text{CDCl}_3$ .

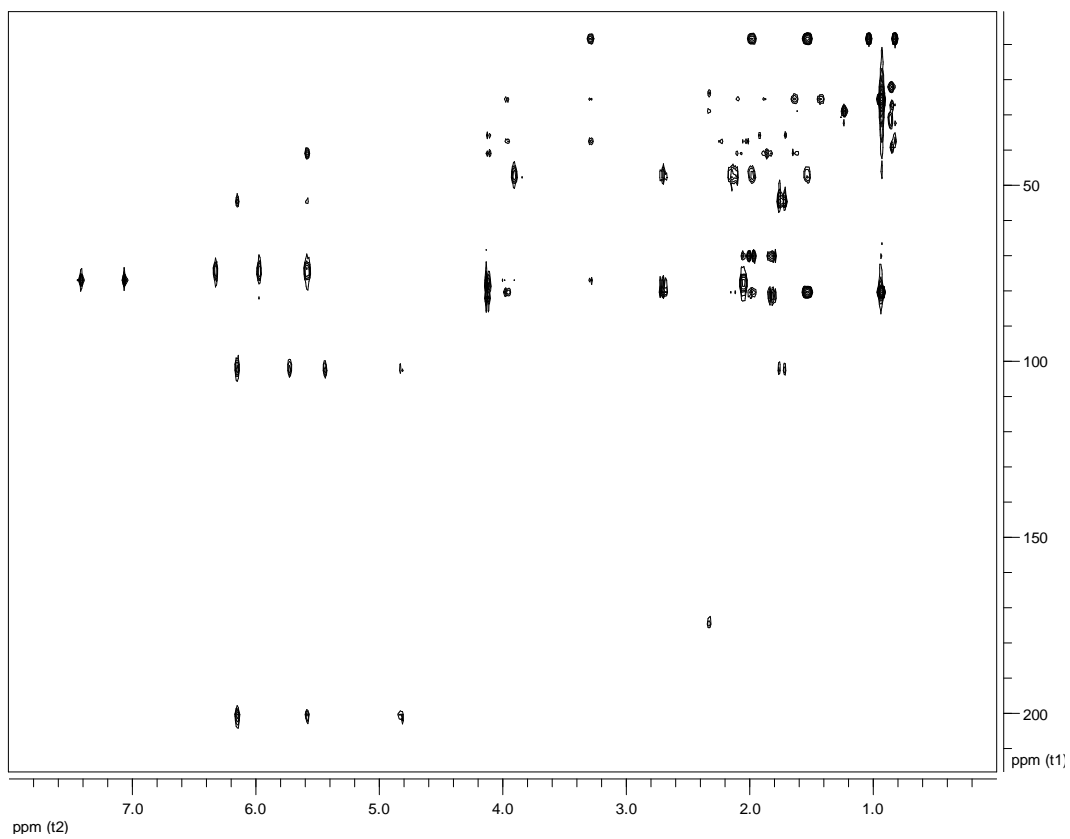

Figure S30. HMBC spectrum of thuwalallene D (5) in CDCl<sub>3</sub>.

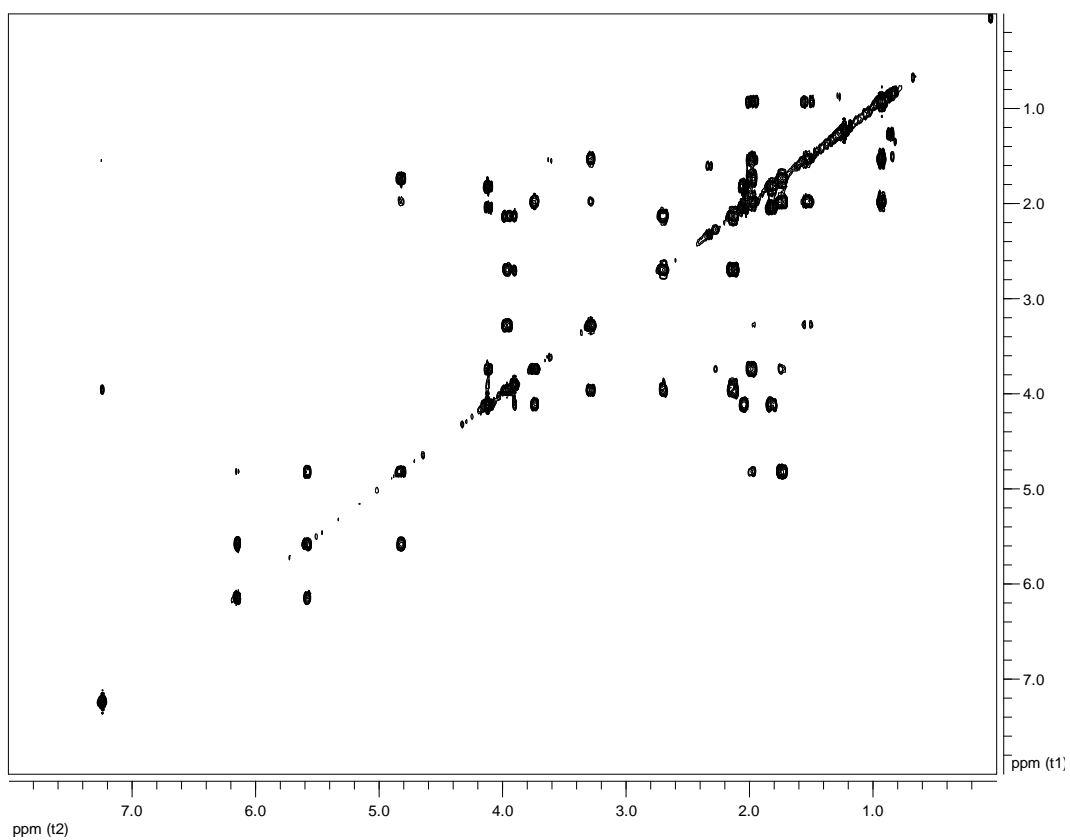

Figure S31. COSY spectrum of thuwalallene D (5) in CDCl<sub>3</sub>.

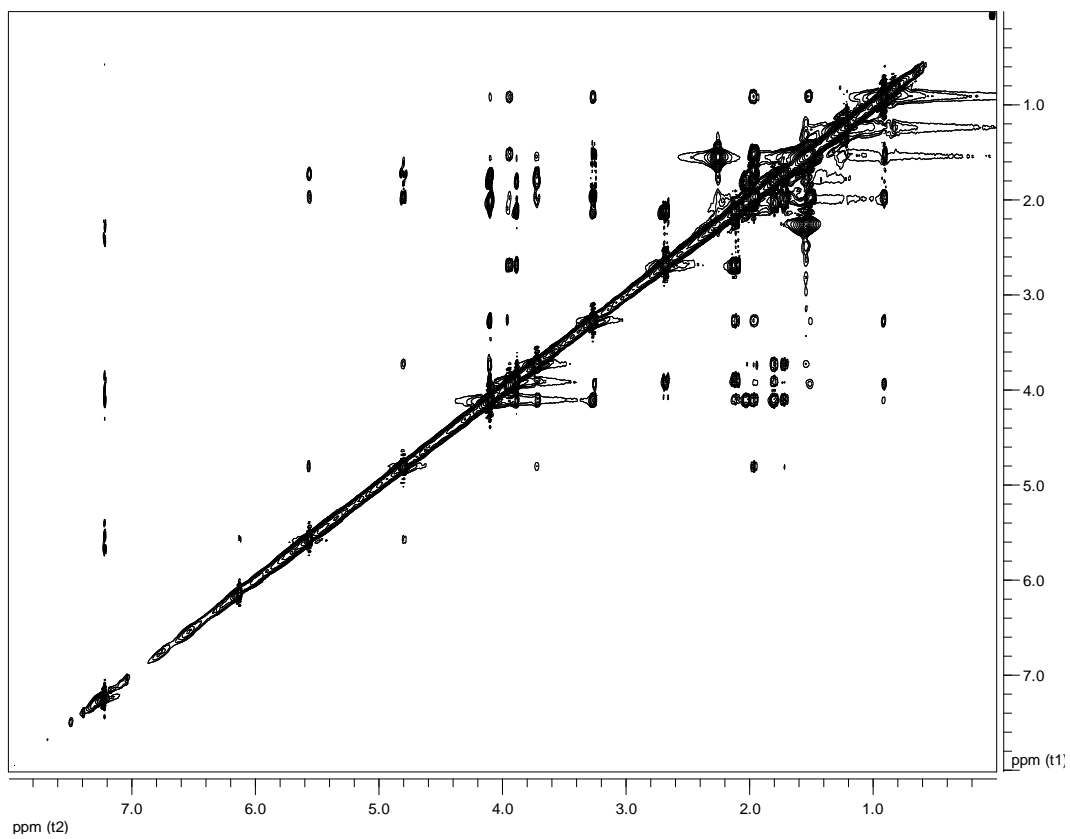

Figure S32. NOESY spectrum of thuwalallene D (5) in  $\text{CDCl}_3$ .

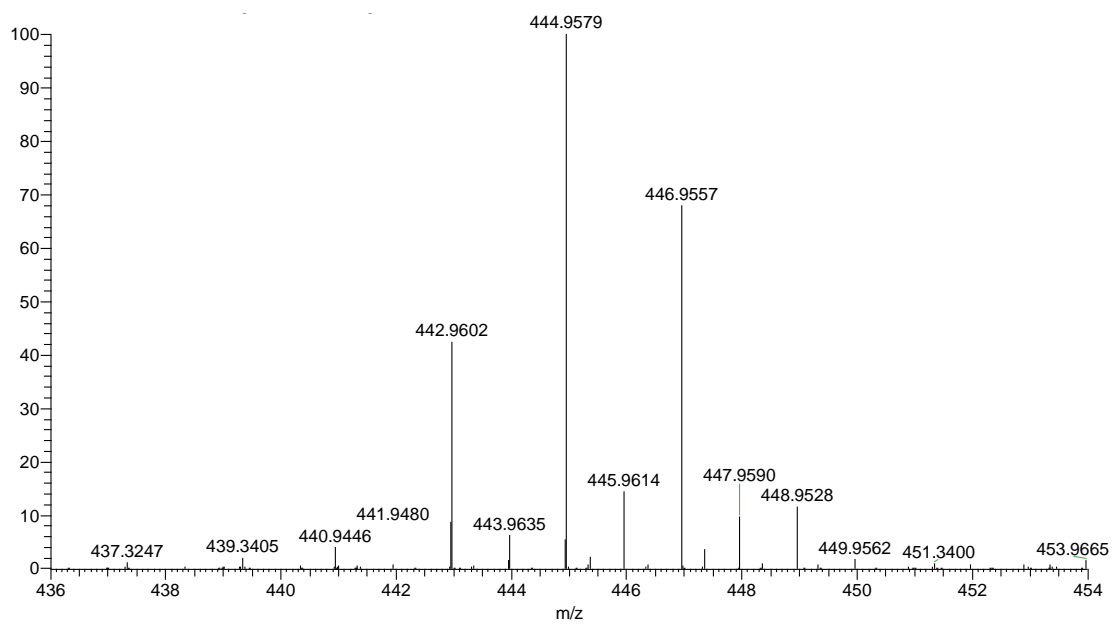

Figure S33. HR-APCIMS spectrum of thuwalallene D (5).

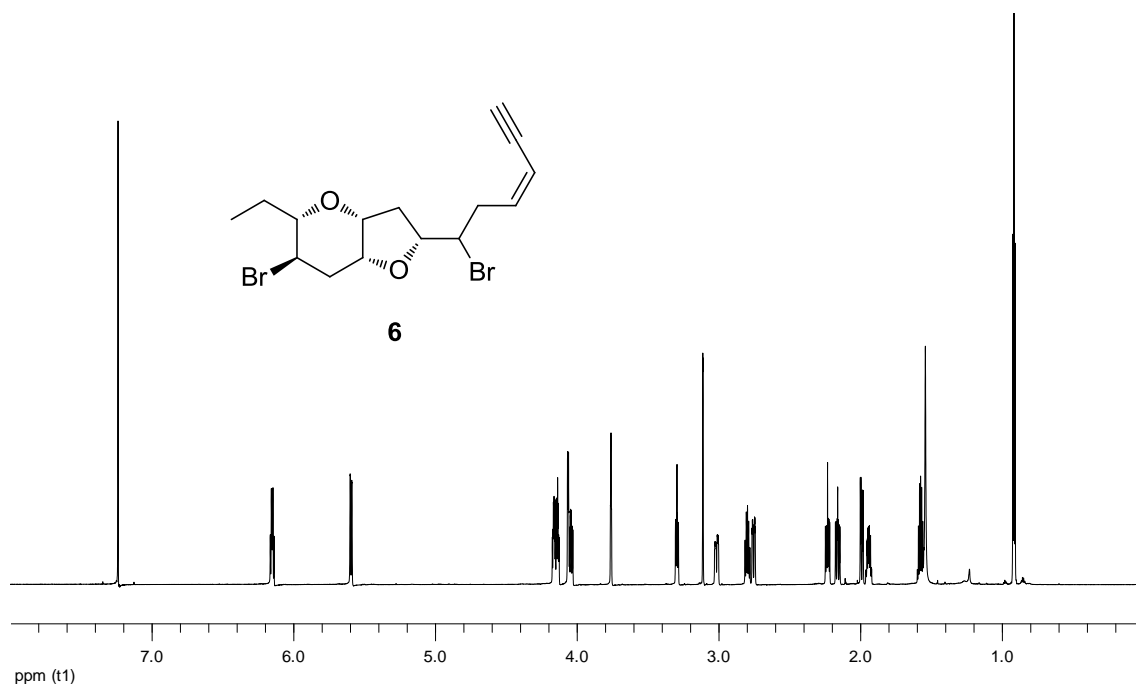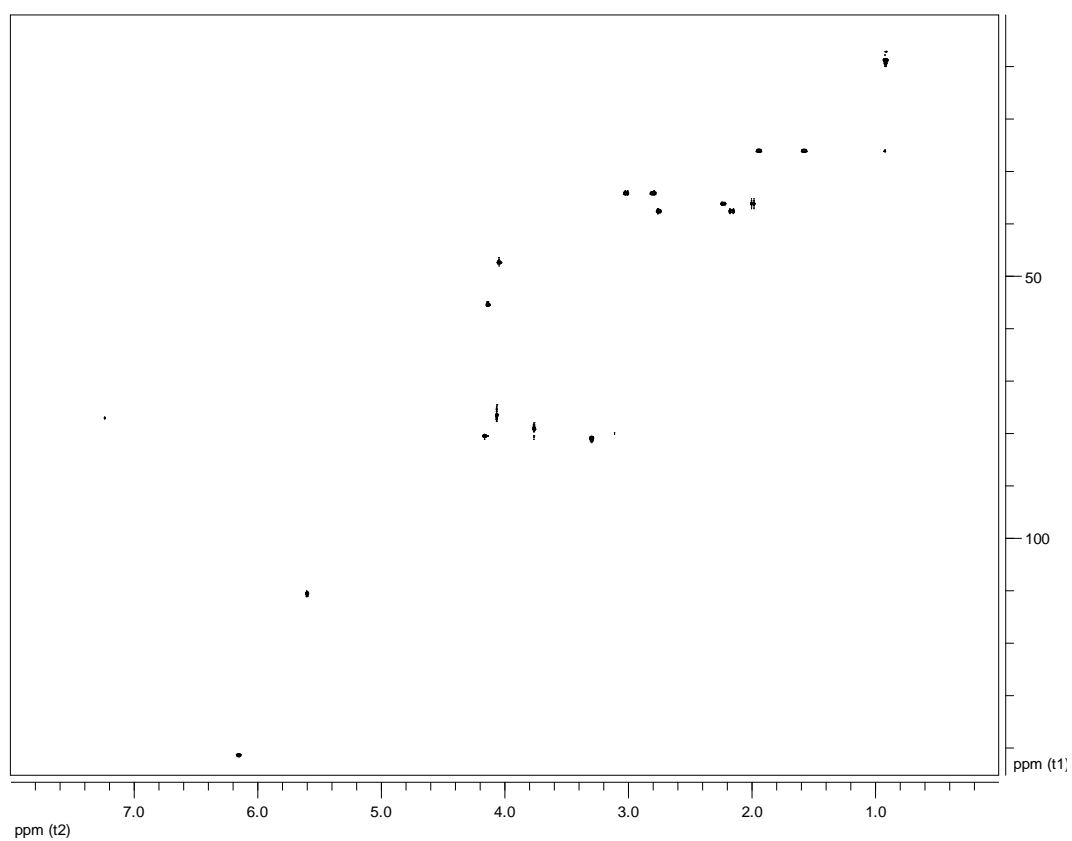

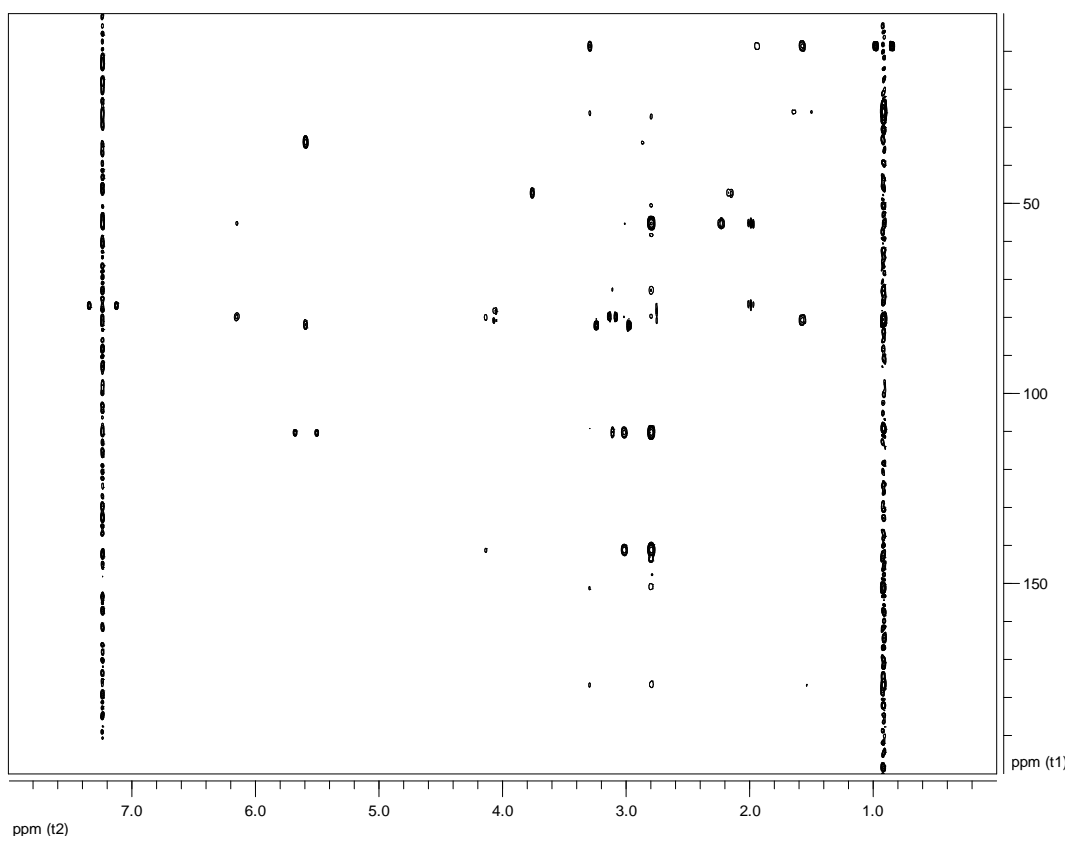

Figure S36. HMBC spectrum of thuwalenyne B (6) in CDCl<sub>3</sub>.

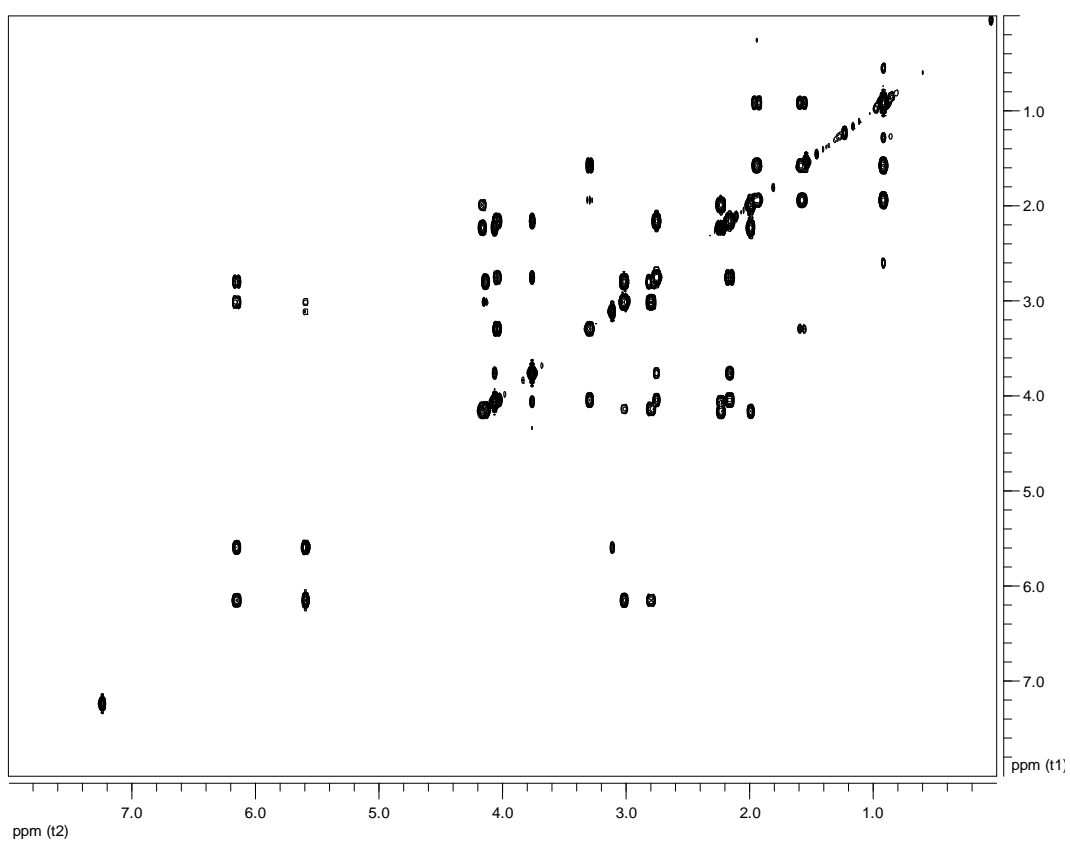

Figure S37. COSY spectrum of thuwalenyne B (6) in CDCl<sub>3</sub>.

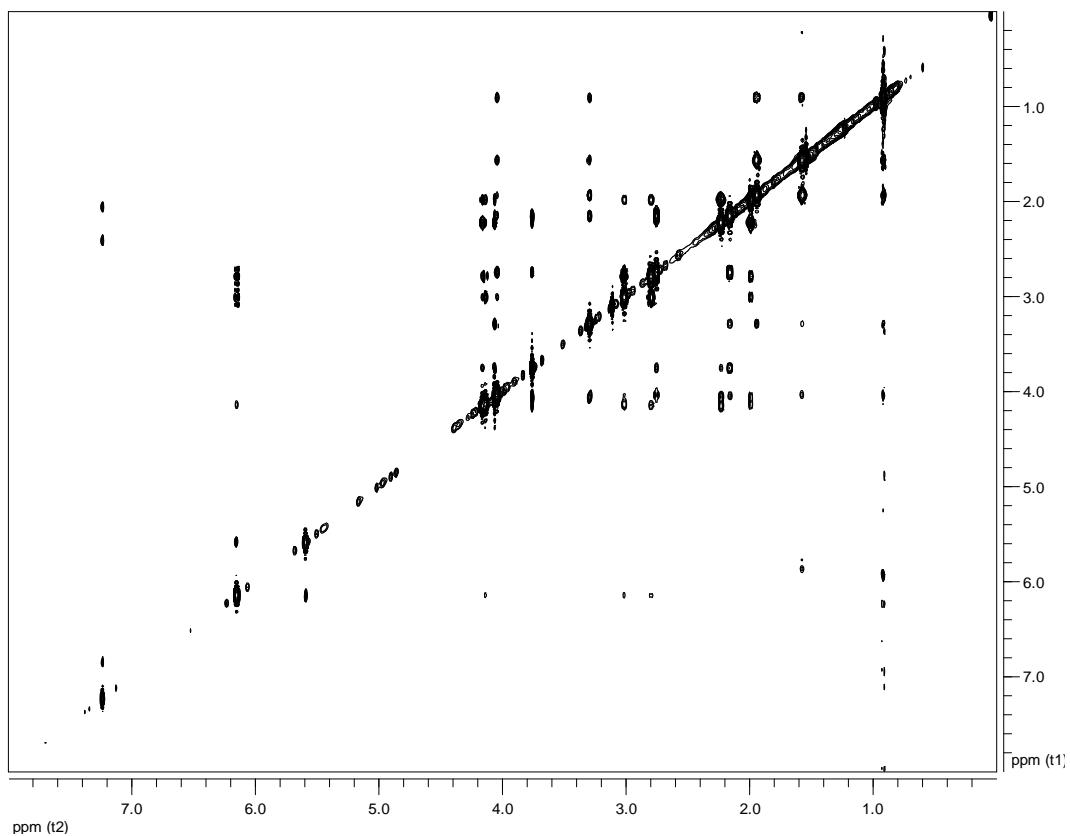

Figure S38. NOESY spectrum of thuwalenyne B (6) in CDCl<sub>3</sub>.

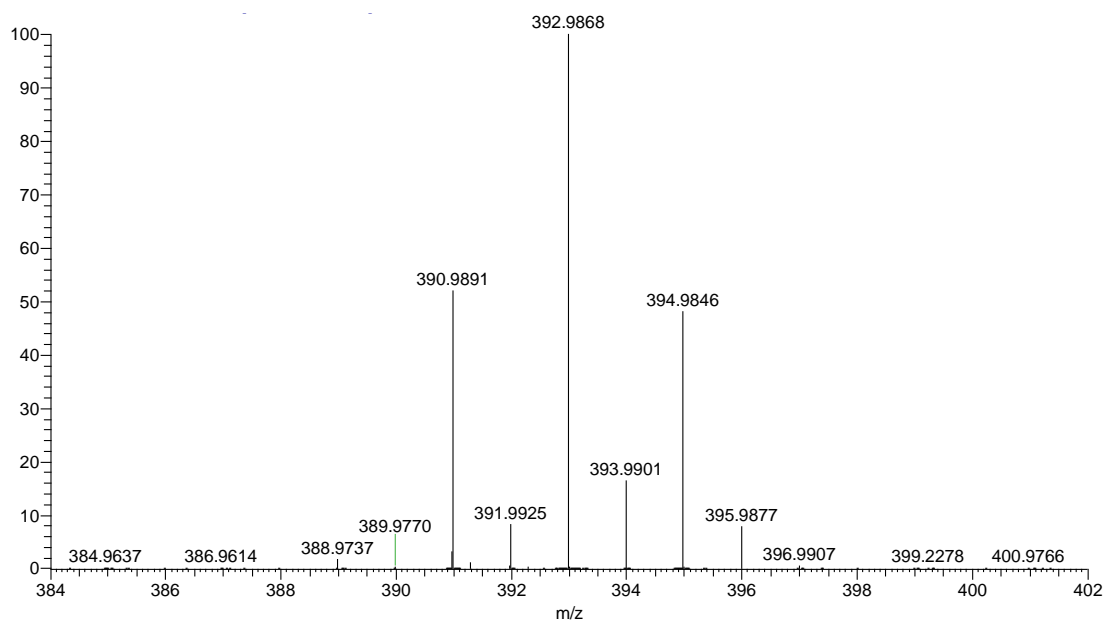

Figure S39. HR-APCIMS spectrum of thuwalenyne B (6).



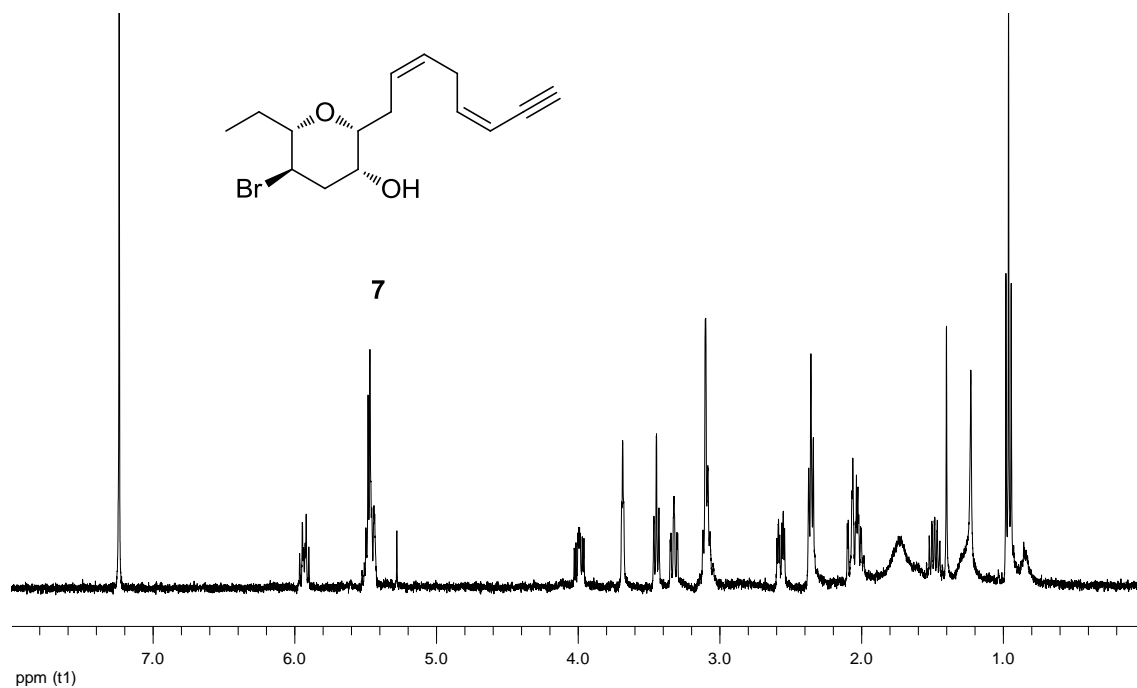

Figure S40. <sup>1</sup>H NMR spectrum of thuwalenyne C (7) in CDCl<sub>3</sub>.

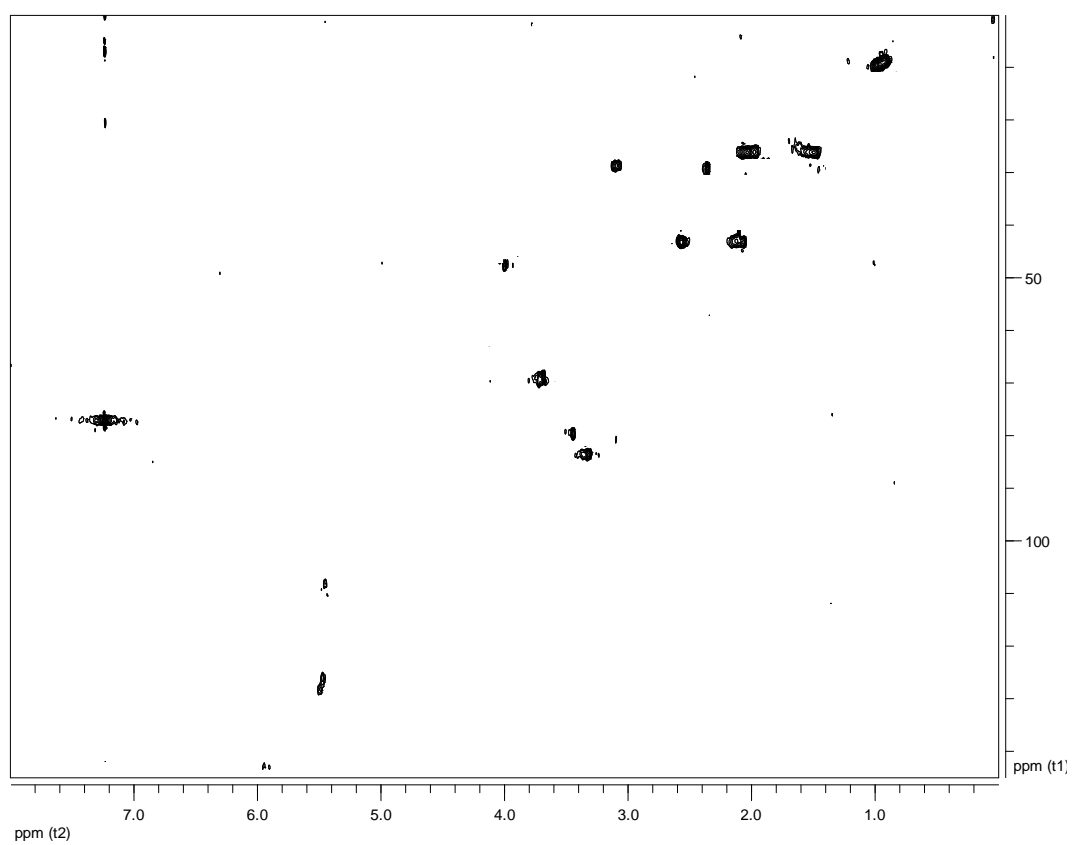

Figure S41. HSQC spectrum of thuwalenyne C (7) in CDCl<sub>3</sub>.

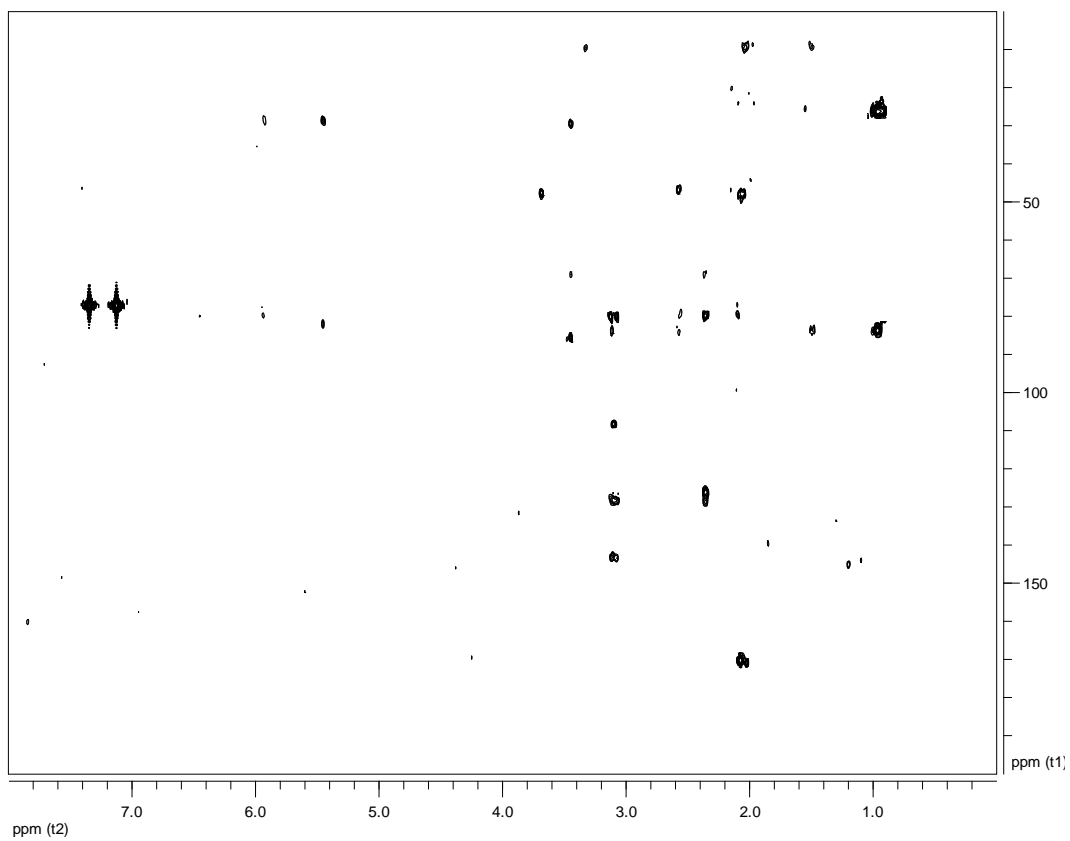

Figure S42. HMBC spectrum of thuwalenyne C (7) in CDCl<sub>3</sub>.

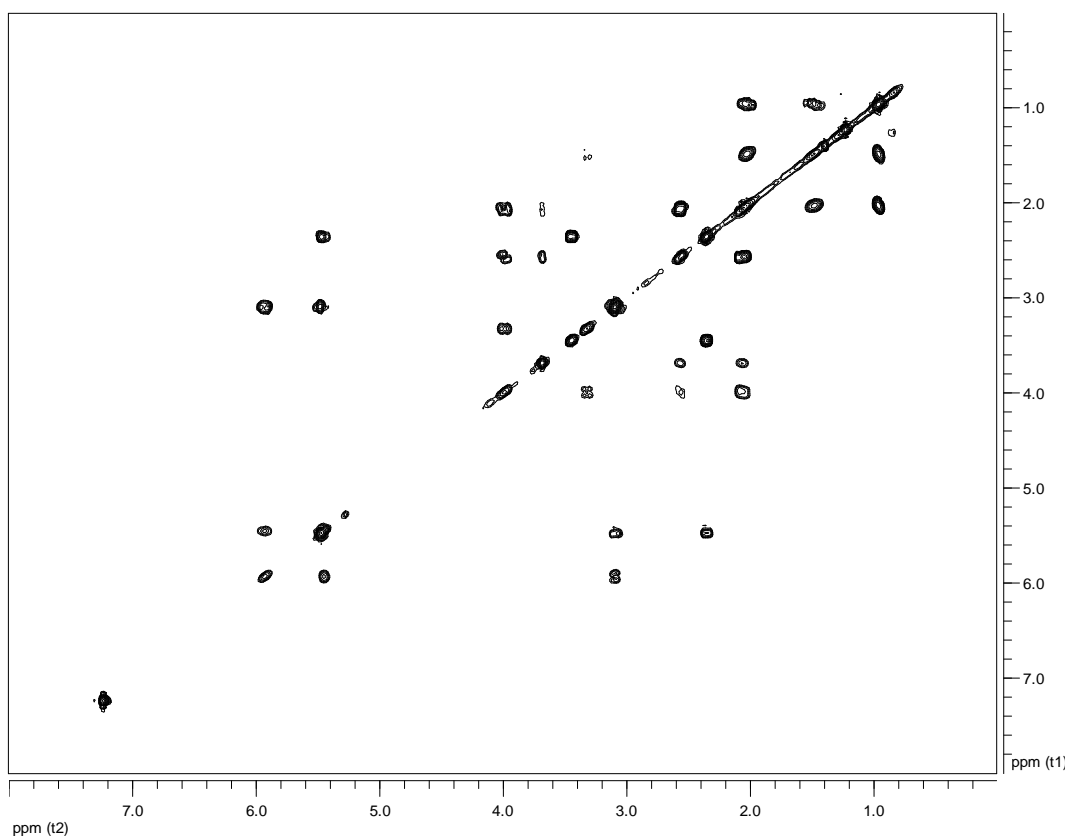

Figure S43. COSY spectrum of thuwalenyne C (7) in CDCl<sub>3</sub>.

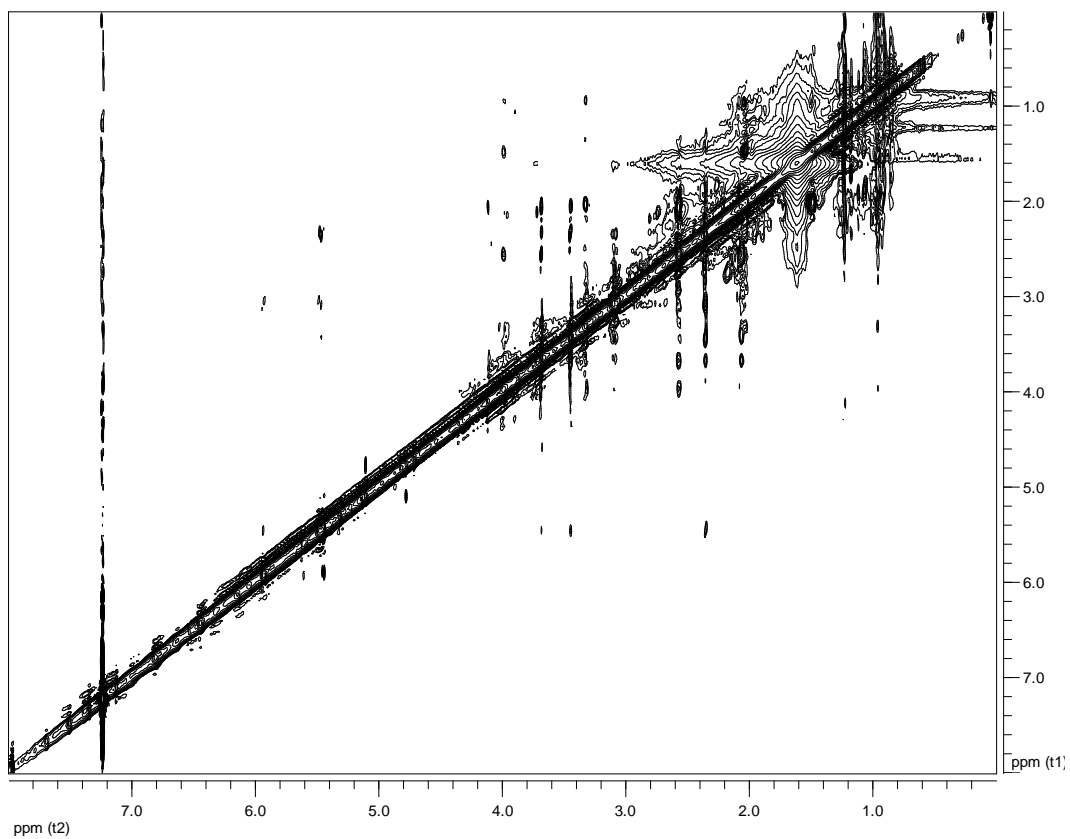

Figure S44. NOESY spectrum of thuwalenyne C (7) in  $\text{CDCl}_3$ .

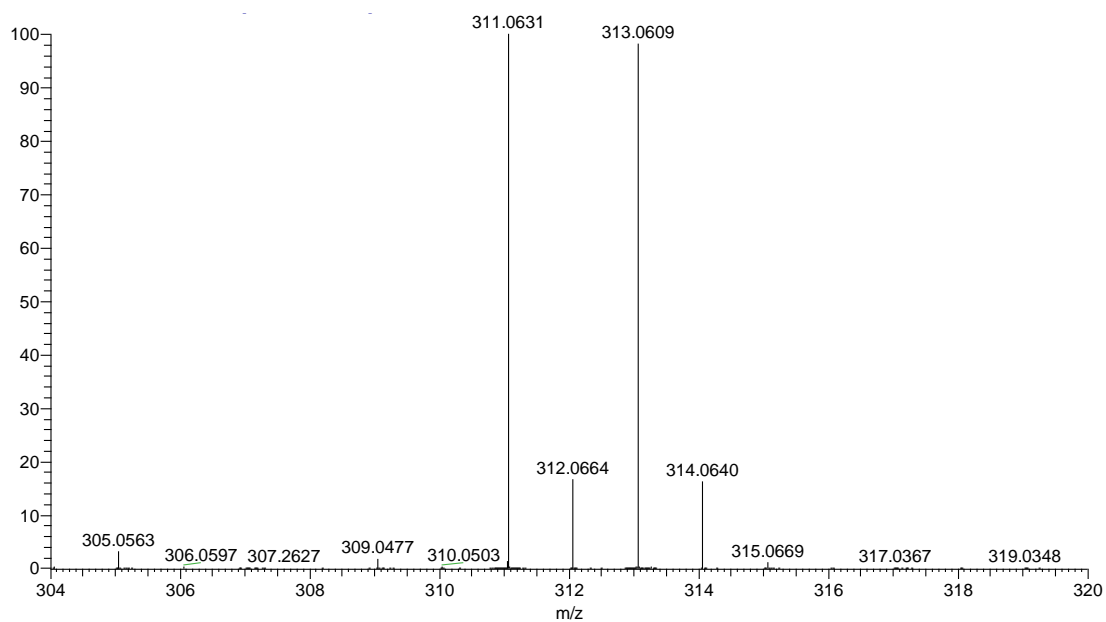

Figure S45. HR-APCIMS spectrum of thuwalenyne C (7).

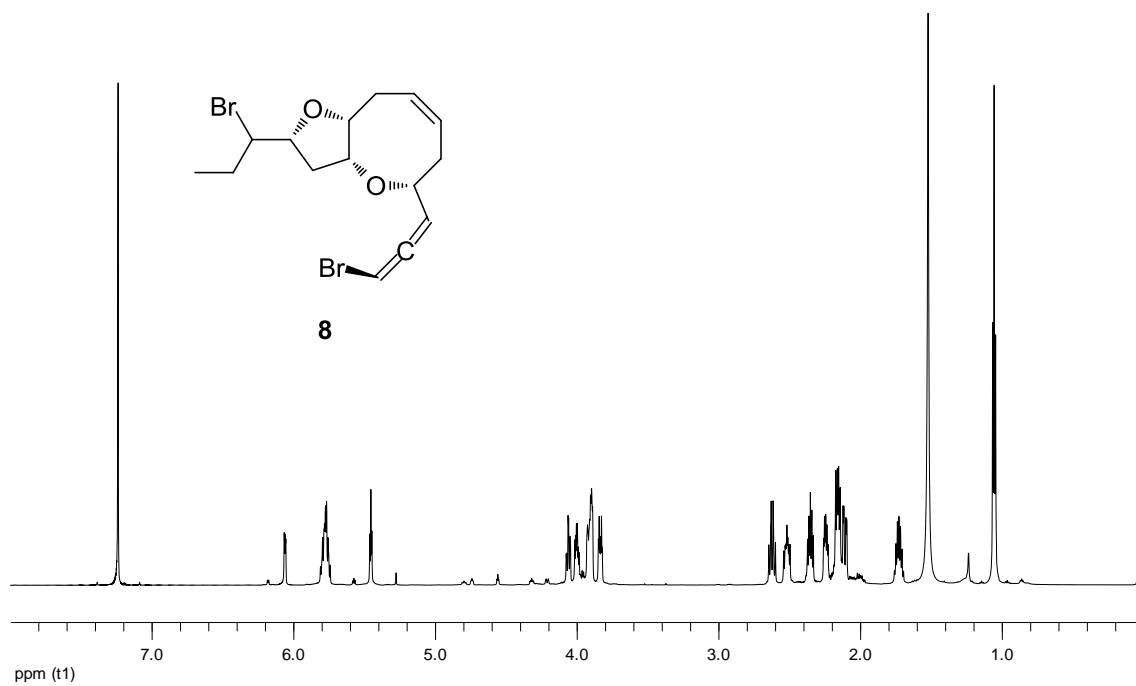

Figure S46.  $^1\text{H}$  NMR spectrum of thuwalallene E (8) in  $\text{CDCl}_3$ .

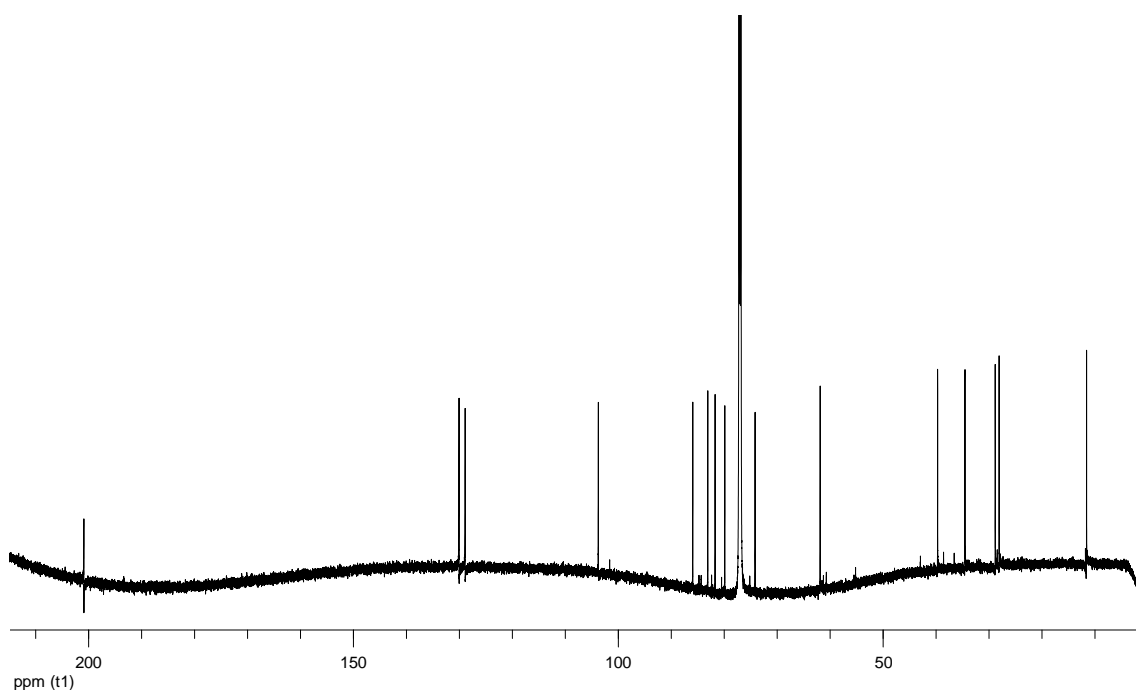

Figure S47.  $^{13}\text{C}$  NMR spectrum of thuwalallene E (8) in  $\text{CDCl}_3$ .

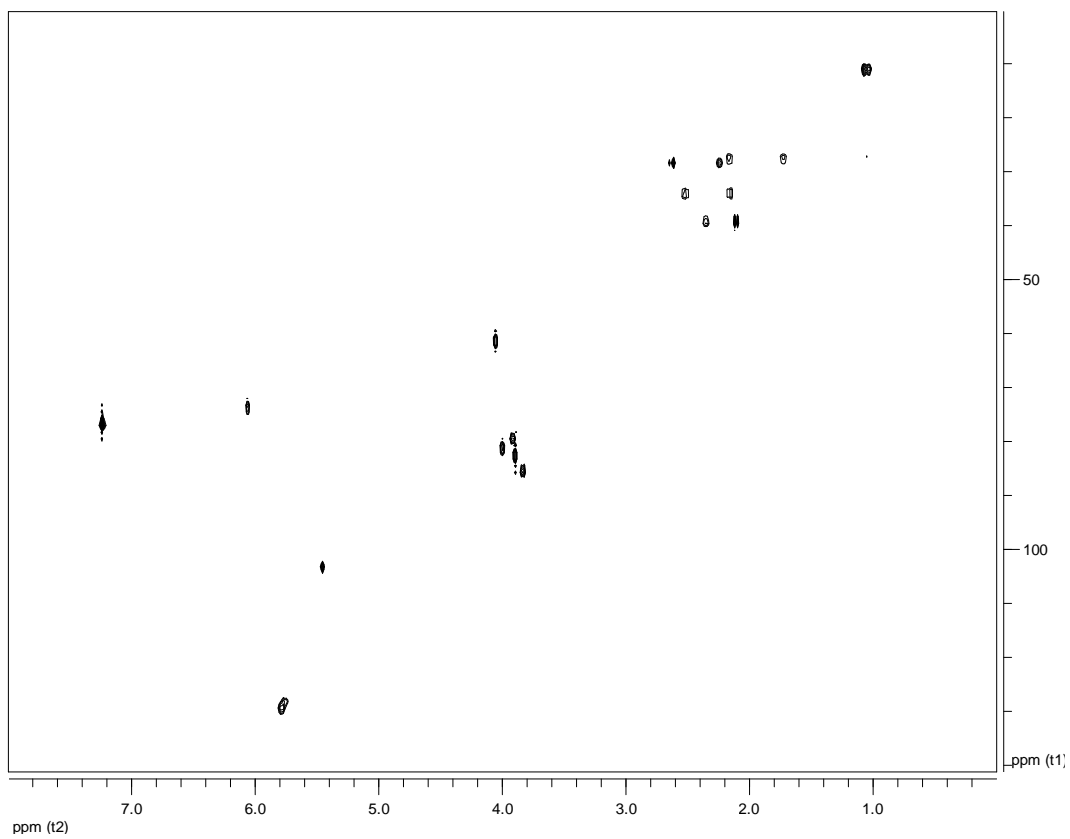

Figure S48. HSQC spectrum of thuwalallene E (8) in CDCl<sub>3</sub>.

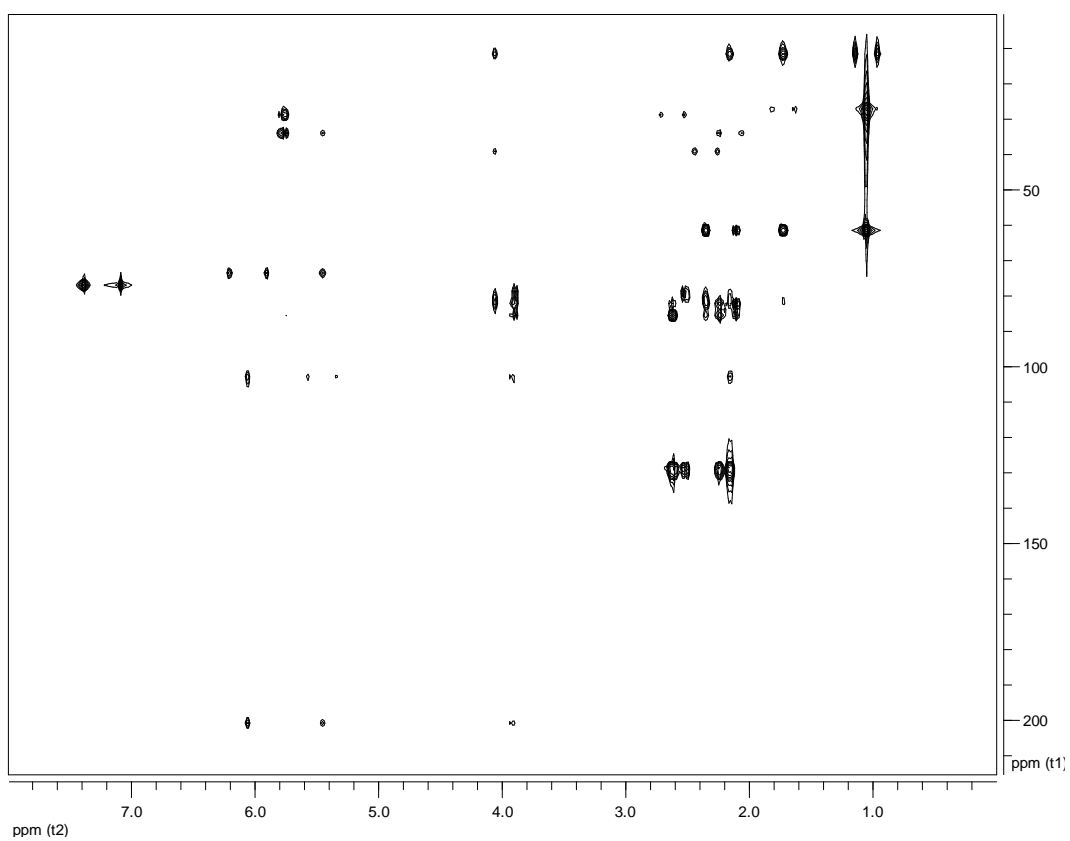

Figure S49. HMBC spectrum of thuwalallene E (8) in CDCl<sub>3</sub>.

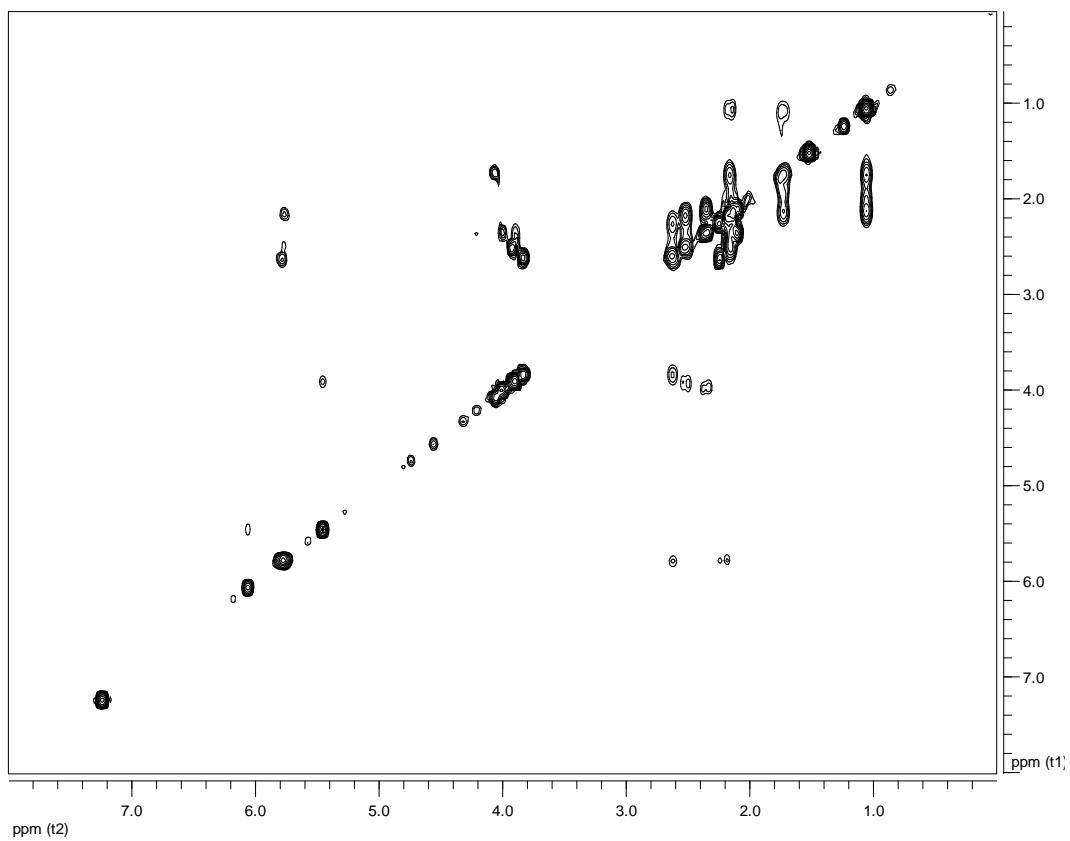

Figure S50. COSY spectrum of thuwalallene E (8) in CDCl<sub>3</sub>.

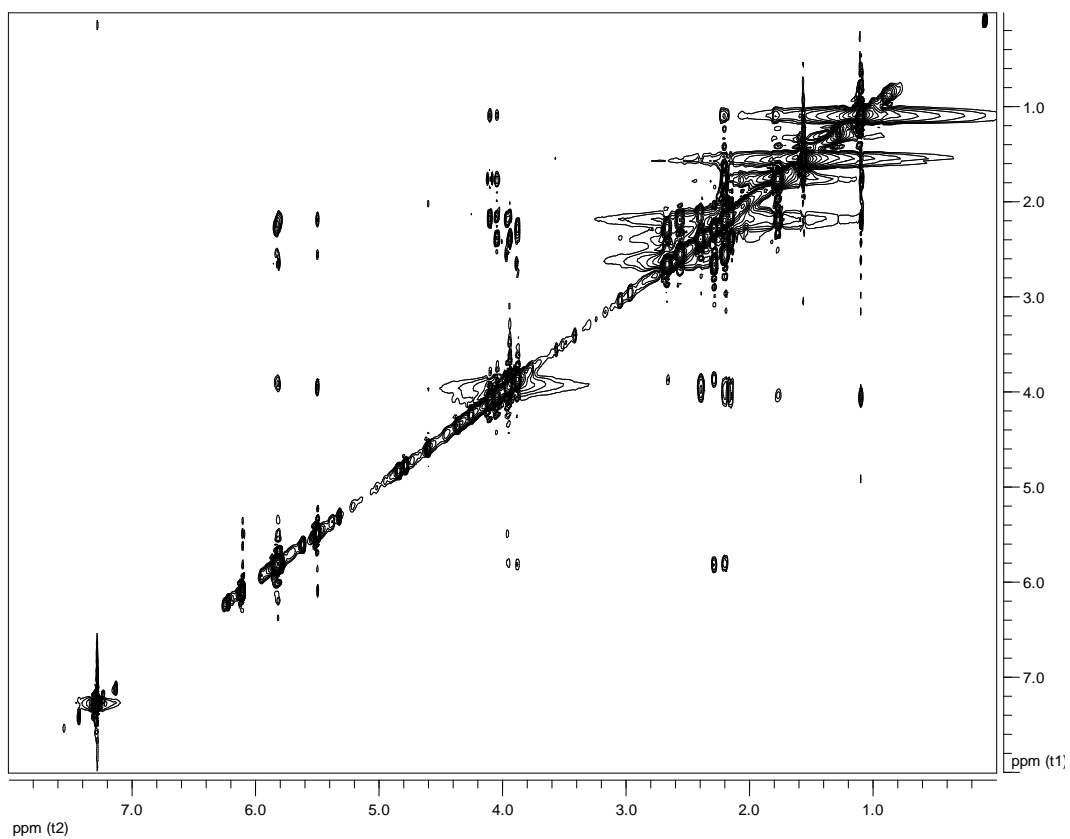

Figure S51. NOESY spectrum of thuwalallene E (8) in CDCl<sub>3</sub>.

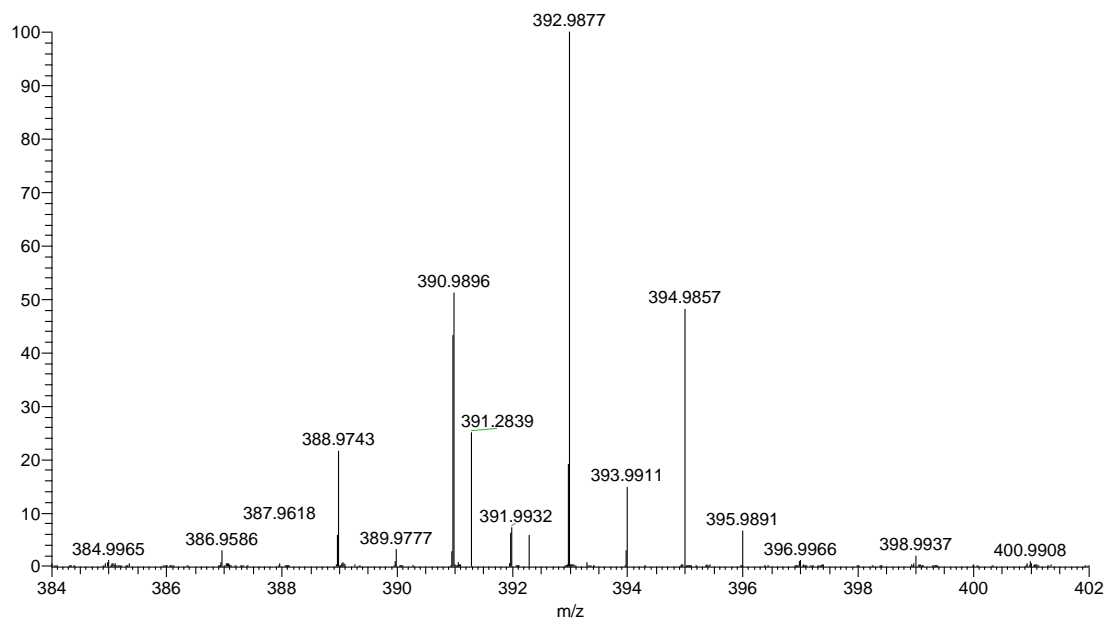

Figure S52. HR-APCIMS spectrum of thuwalallene E (8).

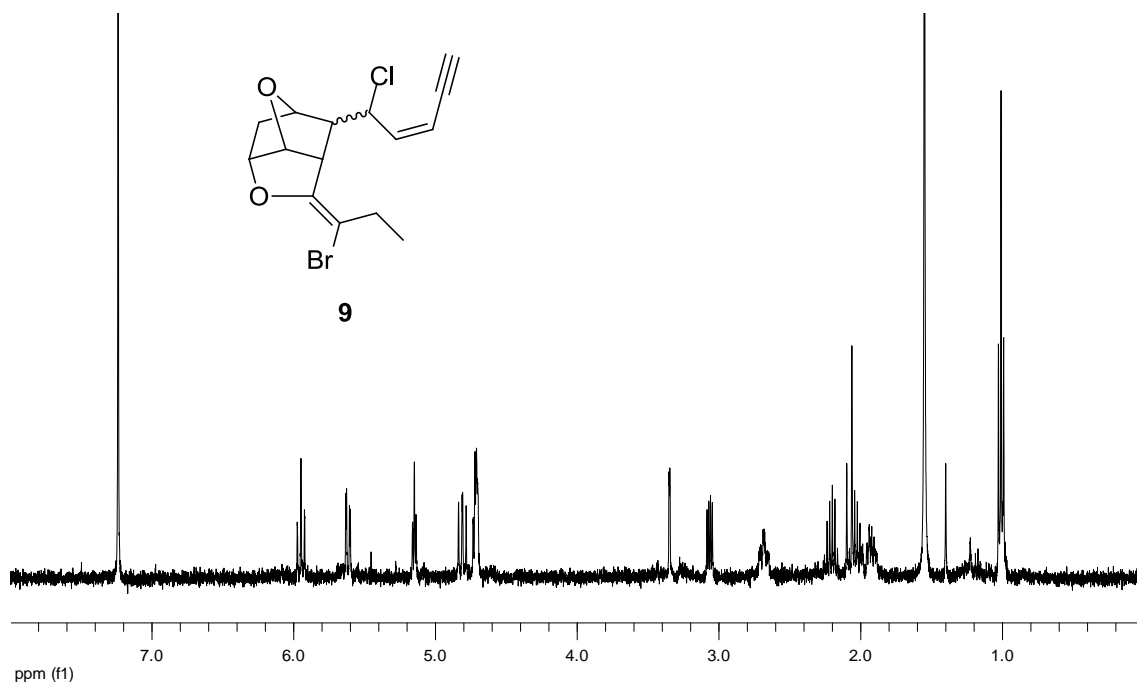

Figure S53.  $^1\text{H}$  NMR spectrum of *cis*-maneone D (9) in  $\text{CDCl}_3$ .

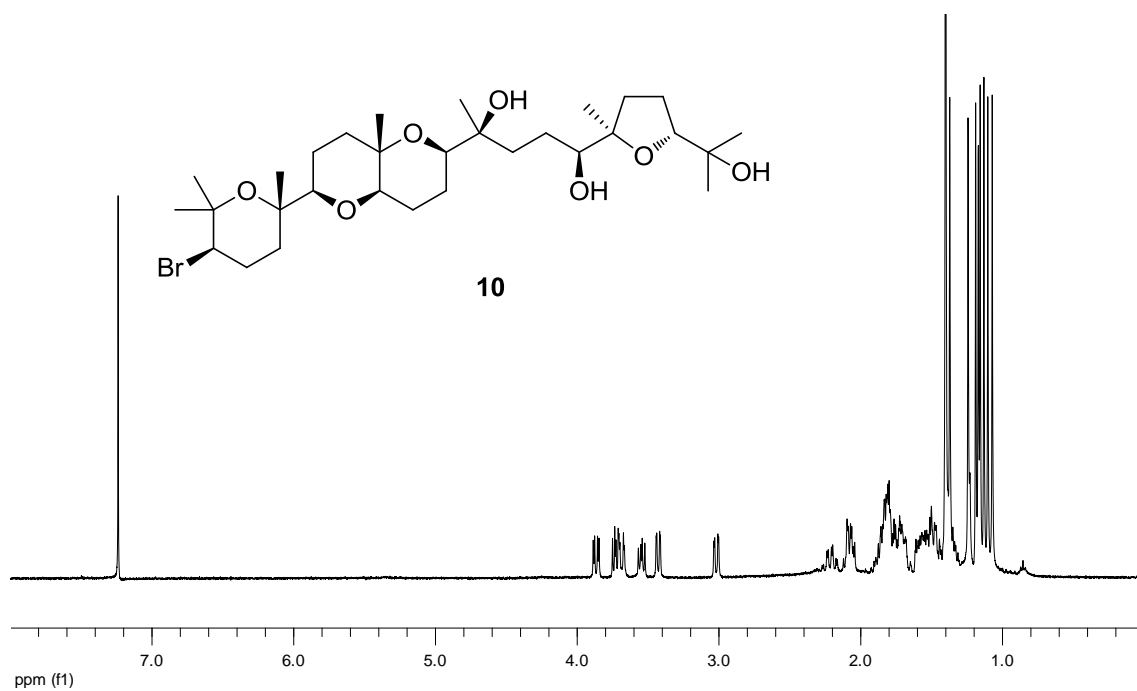

Figure S54.  $^1\text{H}$  NMR spectrum of thysiferol (10) in  $\text{CDCl}_3$ .



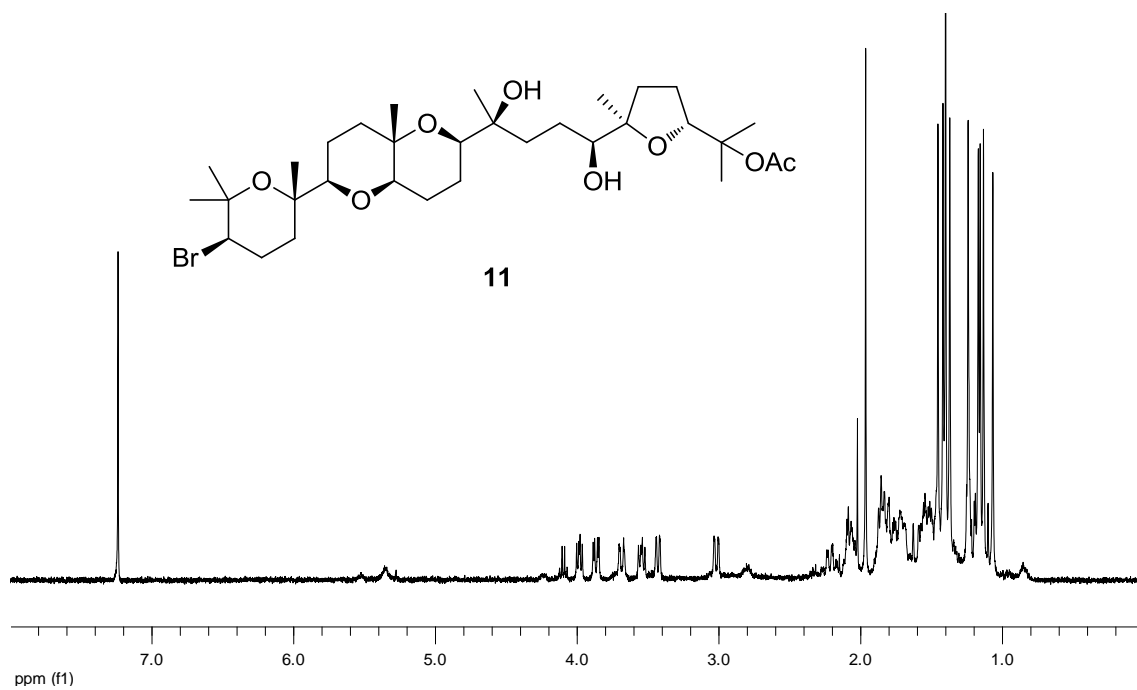

Figure S55. <sup>1</sup>H NMR spectrum of 23-acetyl-thyrsiferol (**11**) in CDCl<sub>3</sub>.
